1 **Mammalian adipogenesis regulators (Aregs) exhibit robust non- and anti-**  
2 **adipogenic properties that arise with age and involve retinoic acid signalling**

3  
4

5 Magda Zachara<sup>1,#</sup> (Email: [magda.zachara@epfl.ch](mailto:magda.zachara@epfl.ch))

6 Pernille Y. Rainer<sup>1,#</sup> (Email: [pernille.rainer@epfl.ch](mailto:pernille.rainer@epfl.ch))

7 Julie M. Russeil<sup>1</sup> (Email: [julie.russeil@epfl.ch](mailto:julie.russeil@epfl.ch))

8 Horia Hashimi<sup>1</sup> (Email: [horia.hashimi@epfl.ch](mailto:horia.hashimi@epfl.ch))

9 Daniel Alpern<sup>1</sup> (Email: [daniel.alpern@epfl.ch](mailto:daniel.alpern@epfl.ch))

10 Radiana Ferrero<sup>1</sup> (Email: [radiana.ferrero@epfl.ch](mailto:radiana.ferrero@epfl.ch))

11 Maria Litovchenko<sup>2</sup> (Email: [m.litovchenko@ucl.ac.uk](mailto:m.litovchenko@ucl.ac.uk))

12 Bart Deplancke<sup>1,\*</sup> (Email: [bart.deplancke@epfl.ch](mailto:bart.deplancke@epfl.ch))

13

14 <sup>1</sup>Laboratory of Systems Biology and Genetics, Institute of Bioengineering, School of Life  
15 Sciences, Ecole Polytechnique Fédérale de Lausanne (EPFL) and Swiss Institute of  
16 Bioinformatics, CH-1015 Lausanne, Switzerland

17 <sup>2</sup>University College London (UCL) Cancer Institute, 72 Huntley Street, London, United  
18 Kingdom

19

20 # Shared First Author

21 \*Corresponding Author: Email: [bart.deplancke@epfl.ch](mailto:bart.deplancke@epfl.ch)

## 22 **Abstract**

23 Adipose stem and precursor cells (ASPCs) give rise to adipocytes and determine the  
24 composition and plasticity of adipose tissue. Recently, several studies have demonstrated that  
25 ASPCs partition into at least three distinct cell subpopulations: *Dpp4*+ stem-like cells, *Aoc3*+  
26 pre-adipocyte-like cells, and the enigmatic CD142+ cells. A great challenge now is to  
27 functionally characterize these distinct ASPC populations. Here, we focus on CD142+ ASPCs  
28 since discrepant properties have been assigned to this subpopulation, from adipogenic to non-  
29 and even anti-adipogenic. To address these inconsistencies, we comprehensively  
30 characterized mammalian subcutaneous CD142+ ASPCs across various sampling conditions.  
31 Our findings demonstrate that CD142+ ASPCs exhibit high molecular and phenotypic  
32 robustness, firmly supporting their non- and anti-adipogenic properties. However, these  
33 properties emerge in an age-dependent manner, revealing surprising temporal CD142+ ASPC  
34 behavioural alterations. Finally, using multi-omic and functional assays, we show that the  
35 inhibitory nature of these adipogenesis-regulatory CD142+ ASPCs (Aregs) is driven by  
36 specifically expressed secretory factors that cooperate with the retinoic acid signalling  
37 pathway to transform the adipogenic state of CD142- ASPCs into a non-adipogenic, Areg-like  
38 one.

## 39 Introduction

40 Although adipogenesis is one of the best-studied cell differentiation paradigms (Rosen and  
41 Spiegelman, 2014), we still have limited knowledge of the *in vivo* origin and composition of  
42 adipose stem and precursor cells (ASPCs, (Ferrero, Rainer and Deplancke, 2020)). This is  
43 partially due to the highly heterogeneous and unstructured nature of adipose tissue depots,  
44 which are present in multiple anatomical locations (including subcutaneous and visceral white  
45 adipose tissue) and consist of a mixture of different cell types (Cristancho and Lazar, 2011),  
46 whose origin and identity differ between distinct fat depots (Cleal, Aldea and Chau, 2017).  
47 Driven by the resolving power of single-cell RNA-sequencing (scRNA-seq), several studies  
48 have recently investigated and confirmed mammalian ASPC heterogeneity (Burl *et al.*, 2018;  
49 Hepler *et al.*, 2018; Schwalie *et al.*, 2018; Cho, Lee and Doles, 2019; Gu *et al.*, 2019; Merrick  
50 *et al.*, 2019; Spallanzani *et al.*, 2019; Sárvári *et al.*, 2021). Our own integrative analysis of  
51 publicly available scRNA-seq data has thereby allowed the compiling of an ASPC  
52 subpopulation consensus based on the fact that the three main identified subpopulations  
53 exhibit a remarkable molecular consistency throughout the analysed datasets (Ferrero, Rainer  
54 and Deplancke, 2020). These subpopulations include adipose stem-like cells with high  
55 expression of *Cd55* and *Dpp4*, pre-adipocyte-like cells with high *Aoc3* and *Icam1* expression,  
56 and a rather enigmatic, third population characterized by high *F3* (coding for CD142) and  
57 *Clec11a* expression. A hierarchy of these ASPCs has also been proposed with the highly  
58 proliferative DPP4+ stem-like cells giving rise to the two other subpopulations: ICAM1+ and  
59 CD142+ ASPCs (Merrick *et al.*, 2019) which themselves may be able to interconvert (Merrick  
60 *et al.*, 2019; Sárvári *et al.*, 2021). These distinct ASPC subpopulations have been shown to  
61 be established as early as post-natal day 12 (P12) in mouse, based on scRNA-seq data  
62 (Merrick *et al.*, 2019). At an even earlier developmental stage (P2), immunofluorescence-  
63 based *in situ* analyses revealed the presence of anatomically partitioned DPP4+ adipose  
64 stem-like and ICAM1+ pre-adipocyte-like cells (Merrick *et al.*, 2019), however, the presence  
65 of CD142+ ASPCs in such young mice has not yet been demonstrated.

66  
67 A great challenge in the field now is to explore whether these molecularly distinct ASPC  
68 subpopulations also have different functional properties. In this study, we decided to focus on  
69 CD142+ ASPCs. This is because previous work has defined these cells as being not only non-  
70 adipogenic but also anti-adipogenic, which is why they were termed “adipogenesis regulators”  
71 (Aregs) (Schwalie *et al.*, 2018). More recent, independent findings supported the notion that  
72 adipose tissue may harbour a negatively regulatory cell type (Lee *et al.*, 2019), yet both its  
73 identity as well as the underlying molecular mechanisms have so far remained ill-defined  
74 (Shamsi, Tseng and Kahn, 2021). The presence of an anti-adipogenic cell population could  
75 have tremendous implications with regard to how adipose tissue development and  
76 homeostasis is regulated in health and disease. This is why further studies are warranted that  
77 explore its existence as well as its molecular and functional properties, especially in light of  
78 recent, divergent findings showing that CD142+ ASPCs are in fact adipogenic (Merrick *et al.*,  
79 2019). The reasons for these functional discrepancies between studies have remained unclear  
80 but are hypothesized to reflect differences in cell isolation and sorting criteria, antibodies,  
81 culturing conditions, sex or age (Merrick *et al.*, 2019; Ferrero, Rainer and Deplancke, 2020;  
82 Corvera, 2021).

83  
84 Given the importance of resolving the molecular and functional heterogeneity of ASPCs, here,  
85 we set out to systematically address these inconsistencies. Our findings validate the molecular

86 and phenotypic robustness of murine CD142+ ASPCs, authenticating these cells as non-  
87 adipogenic inhibitors of adipogenesis. Interestingly however, we demonstrate that these  
88 functional properties are age-dependent. Specifically, we show that the molecular identity of  
89 CD142+ cells is already established before post-natal day 16 (P16), while their non-adipogenic  
90 properties become apparent only four weeks after birth. Importantly, we also confirm the anti-  
91 adipogenic properties of adult CD142+ ASPCs and, using a diverse range of multi-omic- and  
92 functional assays, provide insights into the molecular mechanisms that control their activity.  
93 Particularly, we show that the inhibitory nature of CD142+ ASPCs appears to be driven by a  
94 set of specifically expressed secretory factors, involving Tissue factor (CD142) itself as well  
95 as Matrix Gla protein (MGP), whose actions may possibly converge onto the retinoic acid (RA)  
96 signalling pathway. These factors/pathways seem to function to render CD142+ ASPCs  
97 refractory to adipogenesis, while exerting their anti-adipogenic activity by transforming the  
98 adipogenic state of CD142- ASPCs into a non-adipogenic, CD142+-like state.

## 99 Results

### 100 CD142+ ASPCs are defined by a specific transcriptomic signature and a robust non- 101 adipogenic phenotype

102 In recent years, numerous studies have dissected white adipose tissue (WAT) composition at  
103 the single-cell level (subcutaneous WAT: (Burl *et al.*, 2018; Schwalie *et al.*, 2018; Cho, Lee  
104 and Doles, 2019; Merrick *et al.*, 2019); visceral WAT: (Hepler *et al.*, 2018; Spallanzani *et al.*,  
105 2019; Sárvári *et al.*, 2021); perivascular WAT: (Gu *et al.*, 2019)). Together, these studies  
106 provide an opportunity to acquire high-resolution insights into ASPC heterogeneity through  
107 data integration, essentially allowing to validate and possibly expand or revise our initial  
108 scRNA-seq-based observations (Schwalie *et al.*, 2018). To do so, we integrated data from our  
109 own and relevant publicly available mouse subcutaneous adipose tissue scRNA-seq studies  
110 (Burl *et al.*, 2018; Schwalie *et al.*, 2018; Merrick *et al.*, 2019) revealing that ASPCs robustly  
111 partition among three principal subpopulations in line with earlier observations (**Fig. 1A**,  
112 **Suppl. Fig. 1**, Ferrero *et al.*, 2020). One of these three main ASPC clusters, characterized by  
113 high and specific *F3* (coding for CD142) gene expression, proved to be highly robust and  
114 stable across increasing clustering resolution (**Fig. 1B**), indicating that these cells are  
115 characterized by a clearly delineated and specific transcriptomic signature.

116  
117 Given the particular interest in the *F3+* cluster, previously identified to represent cells having  
118 inhibitory properties toward adipogenesis (Schwalie *et al.*, 2018), we set out to better  
119 understand the specific molecular markers of this population. Using the integrative analysis,  
120 we identified a set of robust markers differentially expressed in each individual scRNA-seq  
121 dataset that are specific to the *F3+* cluster. Combined with the top 20 markers that were  
122 detected by bulk RNA-seq as being differentially expressed in CD142+ *versus* CD142- freshly  
123 isolated ASPCs in our previous study (Schwalie *et al.*, 2018), this resulted in a list of 100  
124 markers that are representative of CD142+ ASPCs (top CD142+ markers, **Suppl. Table 1**,  
125 **Methods**). To assess the relevance of this list of gene expression markers, we carried out an  
126 in-depth quantitative transcriptomic (BRB-seq, Alpern *et al.*, 2019) and proteomic  
127 characterization of FACS-sorted CD142+ *versus* CD142- ASPCs (defined as: SVF Lin-  
128 (CD31- CD45- TER119-) SCA-1+ CD142+ and SVF Lin- SCA-1+ CD142- respectively,  
129 **Suppl. Fig. 2, Methods**). The identified top CD142+ markers revealed to be specific to  
130 CD142+ cells both at the transcriptomic and proteomic level (**Fig. 1C-D, Suppl. Fig. 3A-B**,  
131 **Suppl. Table 1-2**). In addition, we found that overall gene and protein expression levels  
132 correlated well between all scRNA-seq, bulk RNA-seq, and proteomic datasets (**Fig. 1D**,  
133 **Methods**), indicating that the observed transcriptomic signature of CD142+ ASPCs is a  
134 reasonable proxy of their protein/functional characteristics. To assess to which extent this  
135 signature was affected by culturing or differentiation conditions, we performed bulk RNA-seq  
136 of CD142- and CD142+ ASPCs post-expansion and post-differentiation (i.e. after exposure  
137 to adipogenic medium) as well as a proteomic analysis of expanded, respective populations  
138 (**Suppl. Table 2**). Interestingly, we observed that, under these conditions, the expression of  
139 many top CD142+ markers including *Gdf10*, *Cpe*, *Rbp1*, *F3*, *Bgn*, *Clec11a*, *Mgp* and *Aldh1a2*  
140 is maintained both at the transcriptomic and/or proteomic level in CD142+ ASPCs compared  
141 to their CD142- counterparts (**Suppl. Fig. 3C-D, Suppl. Fig. 4**).

142  
143 To examine the functional properties of these cells, we set out to test the phenotype of CD142+  
144 ASPCs across a wide range of experimental conditions and functional assays, aiming to  
145 possibly reconcile discrepant findings of CD142+ ASPC behaviour. First, we recapitulated our

146 earlier findings (Schwalie *et al.*, 2018), showing that the top 5-7% most positive CD142+  
147 ASPCs, isolated using the previously employed anti-CD142 antibody, have very low to no  
148 adipogenic capacity as compared to CD142- ASPCs when stimulated with a standard white  
149 adipogenic differentiation cocktail (**Fig. 1E-F, Methods**). However, since the nature of this  
150 antibody may be one of the possible reasons underlying discrepant CD142+ cell behaviour  
151 read-outs, we tested three more antibodies. While the flow cytometry profiles of the four  
152 assessed antibodies differ to a certain extent, the isolated cellular fractions yielded consistent  
153 non-adipogenic phenotypic results (**Fig. 1E-F, Suppl. Fig. 5A, Methods**). Indeed, when  
154 freshly isolated with different antibodies, the respective CD142+ ASPC samples revealed a  
155 consistent transcriptional signature exhibiting a significantly higher expression score based on  
156 the top CD142+ markers (here named the “CD142+ score”, **Suppl. Table 1, Methods**)  
157 compared to the other tested cellular fractions (total and CD142- ASPCs) (**Fig. 1C and G**).  
158 Finally, the observed non-adipogenic properties of post-differentiation CD142+ cells (i.e. post-  
159 exposure to a standard, adipogenic cocktail) were consistent with the expression profiles of  
160 adipogenesis-relevant genes. Specifically, genes involved in “white fat cell differentiation”  
161 (GO:0050872) or “negative regulation of fat cell differentiation” (GO:0045599) were  
162 significantly lower or higher expressed in CD142+ ASPCs compared to total or CD142-  
163 ASPCs, respectively (**Fig. 1H-I**). Moreover, fat and lipid-related terms that were detected as  
164 significant by gene set enrichment analysis (GSEA) were negatively enriched in CD142+  
165 *versus* CD142- ASPCs (**Suppl. Fig. 5B**).

166  
167 Finally, since CD142 surface expression shows a continuum across ASPCs (**Suppl. Fig. 5A**),  
168 it is possible that the stringency of the cell isolation procedure (so far typically 5-7%) has an  
169 impact on downstream cell behaviour. To investigate this, we isolated CD142+ ASPCs using  
170 a less stringent gating (~20% **Suppl. Fig. 7A**), yet we did not observe a notable difference in  
171 overall differentiation potential compared to the more stringently isolated cells (**Fig. 1J-K**,  
172 **Suppl. Fig. 7B-C**).

173  
174 Next, we examined the influence of the differentiation medium as it is widely established that  
175 adipogenic potential varies as a function of the utilized differentiation cocktail. To do so, we  
176 used the standard “complete DMEM” differentiation medium (with insulin, IBMX and  
177 dexamethasone) as well as three additional ones (1, “Min DMEM”, with insulin only; 2,  
178 “Complete + T3 + Indo DMEM/F12”, with insulin, IBMX, dexamethasone, T3 and  
179 indomethacin; 3, “Min DMEM/F12”, with insulin only, **Methods**, Schwalie *et al.*, 2018; Merrick  
180 *et al.*, 2019). However, we did not observe notable CD142+ ASPC differentiation differences  
181 across these distinct culturing conditions (**Fig. 1J-K**).

182  
183 Another source for discrepant cell behaviour could be the sex of the animals. To test this, we  
184 isolated CD142+ and CD142- ASPCs from both male and female mice, revealing that, upon  
185 exposure to an adipogenic cocktail, the adipogenic propensity of total and CD142- ASPCs  
186 was significantly higher (adjusted p-value (p-adj) < 0.001 and < 0.05, respectively) in males  
187 compared to females (**Fig. 1L-M, Suppl. Fig. 8**). However, both male and female CD142+  
188 cells were completely refractory to adipogenic differentiation (**Fig. 1L-M, Suppl. Fig. 8**). This  
189 is in line with transcriptomic results, as our scRNA-seq analysis of male and female cells  
190 (**Suppl. Fig. 9A**) (Schwalie *et al.*, 2018) revealed the existence of a clearly delineated  
191 *F3*(CD142)+ cluster in both sexes with a highly consistent overlap of specific markers (**Suppl.**  
192 **Fig. 9B-C**). In addition, the integration of the different publicly available scRNA-seq datasets

193 included cells from mice of different sexes and clearly showed the existence of a robust *F3+*  
194 cluster (Burl *et al.*, 2018; Schwalie *et al.*, 2018; Merrick *et al.*, 2019) (**Fig. 1B, Suppl. Fig. 1**).

195

196 Together, these in-depth computational and experimental analyses validate the previously  
197 observed molecular identity of CD142+ ASPCs and demonstrate the robustness of their non-  
198 adipogenic phenotype across a wide range of conditions and experiments.

199

### 200 **Age-dependent molecular and phenotypic emergence of *bona fide* CD142+ ASPCs**

201 The findings reported above indicate that CD142+ ASPCs constitute a distinct cell population  
202 with a well-defined molecular identity and a clear non-adipogenic character. However, all of  
203 these analyses were performed on cells derived from adult mice, prompting the question  
204 whether the observed CD142+ cell properties could perhaps be age-dependent. Analysis of  
205 publicly available scRNA-seq data of post-natal day 12 (P12) mice revealed a CD142+ cluster  
206 that shares many of the adult top CD142+ markers (Merrick *et al.*, 2019, **Suppl. Fig. 10A-B**)  
207 and overlaps with adult CD142+ ASPCs upon data integration (**Suppl. Fig. 10C-D**).  
208 Nevertheless, we uncovered that the identity of these P12 *F3*(CD142)+ cells, as defined by  
209 their “CD142+ score” (**Suppl. Table 1**), is significantly less pronounced compared to their  
210 adult counterpart ( $p$ -value < 0.001, **Fig. 2A, Suppl. Fig. 10E**). To investigate whether this  
211 more subtle molecular identity would also manifest itself at the phenotypic level, we assessed  
212 the proportion and adipogenic propensity of distinct ASPC subpopulations at distinct  
213 developmental time points including newborn (P0), 12-17-day-old (P12-17) mice as well as  
214 juvenile (4-week-old (4wo)) and adult (7wo and 11wo) animals with these two groups being  
215 separated by weaning at post-natal day 21 (P21). Given the overlap between P12 and adult  
216 CD142+ ASPCs in the scRNA-seq analysis and the specificity of *F3*(CD142) in both age  
217 groups (**Suppl. Fig. 10B**) (Merrick *et al.*, 2019), we used the CD142 marker to enrich for our  
218 cellular fractions of interest across ages. We observed significant differences in the  
219 proportions of cellular fractions assessed by flow cytometry, with the Lineage negative (SVF  
220 Lin<sup>-</sup>) portion being significantly higher ( $p$ -adj < 0.0001) and the ASPC portion (SVF Lin<sup>-</sup>  
221 SCA-1+) significantly lower ( $p$ -adj < 0.05) in pre-weaning (P0 and P12-17) compared to post-  
222 weaning mice (4wo, 7wo and 11wo) (**Fig. 2B-C, Suppl. Fig. 11A**). In addition, ASPCs from  
223 pre-weaning mice exhibited significantly lower ( $p$ -adj < 0.01) CD142 cell surface expression  
224 compared to post-weaning animals (**Fig. 2B-C**). Indeed, we found that at the gating stringency  
225 corresponding to 5% of CD142+ cells in adult (11wo) mice, only 2.5% of newborn (P0)  
226 CD142+ ASPCs were captured (**Fig. 2B-C**), consistent with the observed gradual decrease  
227 of the CD142<sup>-</sup> ASPC fraction as mice mature (**Suppl. Fig. 11A-B**).

228

229 Next, we assessed the adipogenic capacity of the different ASPC fractions as a function of  
230 age. Using the standard differentiation cocktail (**Methods**), we unexpectedly observed that all  
231 cellular fractions (total, CD142<sup>-</sup> and CD142+ ASPCs) derived from pre-weaning mice  
232 exhibited a remarkable adipogenic propensity with virtually all cells displaying lipid  
233 accumulation. However, based on visual inspection, the overall size of the pre-weaning cells  
234 and the size of the accumulated lipid droplets tended to be smaller compared to post-weaning  
235 cells (**Fig. 2D**). Perhaps most interestingly, pre-weaning-derived CD142+ ASPCs gave rise to  
236 *in vitro* adipocytes, which is in stark contrast to the marked non-adipogenic properties of their  
237 post-weaning counterparts (**Fig. 2D-E, Suppl. Fig. 11C-E**). Indeed, we observed that, despite  
238 non-negligible variability between independent replicates, the adipogenic propensity of total  
239 and CD142<sup>-</sup> ASPCs gradually decreases with age, whereas CD142+ ASPCs exhibit a very

240 sharp drop ( $p\text{-adj} < 0.0001$ ) in their ability to give rise to *in vitro* adipocytes between the 16<sup>th</sup>  
241 and 28<sup>th</sup> (4wo) day of post-natal development (**Fig. 2D-E, Suppl. Fig. 11C-E**).

242

243 To further explore this age-dependent functional change of CD142+ ASPCs, we performed  
244 bulk RNA-seq on freshly isolated ASPC cellular fractions at different time points after birth  
245 (P0, P16, 4wo, 7wo and 11wo, **Suppl. Table 2**). Analysis of the resulting data revealed that  
246 age is the variable that explains the largest variation across samples as they are ordered by  
247 this feature along the first principal component (PC1) (**Fig. 2F**). GSEA revealed that terms  
248 such as “cell fate commitment” (GO:0045165), “mesenchymal cell differentiation/proliferation  
249 and development” (GO:0048762, GO:0010463, GO:0014031), “stem cell differentiation”  
250 (GO:0048863), “stem cell population maintenance” (GO:0019827) and cell cycle-related terms  
251 are negatively enriched in the genes driving PC1 (**Suppl. Fig. 12A**). This suggests that genes  
252 linked to these terms are up-regulated in freshly isolated young ASPCs, likely reflecting their  
253 more naïve “stem” condition. Indeed, all ASPC fractions that were freshly isolated from the  
254 newborn burgeoning fat pads expressed substantially higher levels of *Ccnd1* (coding for  
255 CyclinD1) and *Dlk1/Pref1*, and lower levels of markers such as *Pdgfrb*, *Cd34* and *Ly6a* (coding  
256 for SCA-1) compared to ASPCs from older animals (**Suppl. Fig. 12B-F**). Such a signature  
257 was proposed to select for a primitive and naïve precursor population (Wang *et al.*, 2003;  
258 Atanassova, Rancic and Georgieva, 2012; Hepler and Gupta, 2017). Interestingly, it has also  
259 been shown that foetal and early post-natal ASPCs from murine subcutaneous depots  
260 surprisingly express perilipin (*Plin1*) and adiponectin (*Adipoq*) and exhibit highly proliferative  
261 and differentiation properties (Hong *et al.*, 2015; Hepler and Gupta, 2017), consistent with our  
262 observations for newborn-derived ASPCs (**Suppl. Fig. 12G-H, Suppl. Fig. 11C-E**). In contrast,  
263 lipid/fat-related terms were enriched in freshly isolated adult ASPCs, implying a molecular  
264 state which is less naïve and more committed towards adipogenesis (**Suppl. Fig. 12A**). We  
265 further found that the “retinol/retinoid metabolic process” (GO:0042572/GO:0001523) gene  
266 expression signature is much more prominent in adult-derived ASPCs compared to young  
267 ASPCs, which correlates with the decreased adipogenic capacity of adult *versus* young  
268 ASPCs. (**Suppl. Fig. 13A-B**). In addition to this general increase with age, this same RA-  
269 related expression signature was even more pronounced in 4wo and adult CD142+ compared  
270 to CD142- ASPCs (**Suppl. Fig. 13C**). Interestingly, the “CD142+ score” (**Suppl. Table 1**)  
271 increased in all the cellular fractions of ASPCs (CD142-, CD142+ and total ASPCs) in an age-  
272 dependent manner (**Fig. 2G, Suppl. Fig. 14A**). We thereby observed that this set of top  
273 markers becomes significantly enriched in CD142+ ASPCs (compared to CD142- ASPCs) at  
274 P16 and is particularly prominent in adult cells (**Suppl. Fig. 14B-E**). Moreover, when we  
275 removed the age-driven source of variation from the analysed samples, CD142+ ASPCs from  
276 all developmental time points, except P0, were marked by a relative and substantial increase  
277 of the “CD142+ score” compared to the other assessed fractions (all ages, total and CD142-  
278 ASPCs), while being once again more pronounced in adults, reflecting the results from our  
279 scRNA-seq analysis of P12- and adult-derived ASPCs (**Fig. 2A**) (Merrick *et al.*, 2019). This  
280 increase was accompanied by a gradual decrease of the “CD142+ score” in all CD142-  
281 ASPCs with age (**Fig. 2H**).

282

283 Together, these findings suggest that ASPCs and their considered subpopulations are  
284 molecularly and phenotypically naïve at birth, after which they gradually acquire their  
285 respective properties throughout the early post-natal developmental stages. Furthermore, the  
286 definite “CD142+-specific expression signature” appears to emerge in CD142+ ASPCs before



287 P16, followed by the manifestation of their completely non-adipogenic phenotype by post-natal  
288 week 4.

289

### 290 **CD142+ ASPC-dependent adipogenic inhibition and mediating factors**

291 The findings above validate the previously described molecular identity of CD142+ ASPCs,  
292 provide additional evidence as to the robustness of their non-adipogenic character, and add  
293 the interesting dimension of this phenotypic property emerging with age. Importantly, our  
294 results also corroborate the notion that adult CD142+ ASPCs are not only non-adipogenic, but  
295 also anti-adipogenic. This is because adult CD142- ASPCs reproducibly exhibit a greater  
296 adipogenic propensity than total ASPCs (**Fig. 1E-F, Fig. 2D-E**), suggesting that the presence  
297 of CD142+ ASPCs dampens the adipogenic capacity of their CD142- counterparts (as a  
298 progenitor population devoid of CD142+ ASPCs and featuring a high adipogenic potential).  
299 To better understand underlying mechanisms governing the inhibitory function of CD142+  
300 ASPCs, we first re-explored the anti-adipogenic nature of these cells using a transwell set-up  
301 allowing specific ASPC subpopulations to be co-cultured but without cell-to-cell contact  
302 (**Methods**). These experiments revealed that CD142- ASPCs co-cultured with CD142+  
303 ASPCs show a significantly decreased capacity to generate adipocytes (p-value < 0.01)  
304 compared to CD142- ASPCs cultured on their own (**Fig. 3A-B**). To molecularly support these  
305 results, we performed bulk RNA-seq of differentiated CD142- ASPCs and differentiated  
306 CD142- ASPCs co-cultured with CD142+ ASPCs (**Suppl. Table 2**). Consistent with our  
307 phenotypic observations, CD142- ASPCs cultured alone showed a significantly higher  
308 expression of genes related to “white fat cell differentiation” (GO:0050872) (**Fig. 3C**), while  
309 key genes linked to the “negative regulation of fat cell differentiation” (GO:0045599) were up-  
310 regulated in CD142- ASPCs co-cultured with CD142+ cells (**Fig. 3D**). These results  
311 recapitulate CD142+ ASPCs’ previously reported capacity to inhibit adipogenesis through  
312 paracrine signalling (Schwalie *et al.*, 2018). Together with a recent, independent report  
313 showing a comparable capacity of CD142+ stromal cells in muscle (Camps *et al.*, 2020), we  
314 therefore decided to reintroduce the original “Adipogenesis regulators” (Aregs) nomenclature  
315 to conceptually define CD142+ ASPCs.

316

317 Given that Aregs can exert their activity *via* paracrine signalling, we explicitly mined the  
318 transcriptome and proteome data to identify Areg-specific *secreted* factors. This resulted in a  
319 stringent set of highly Areg-specific candidates including *F3* (coding CD142) itself, *Mgp*,  
320 *Gdf10*, *Clec11a*, *Cpe* and *Bgn* (**Fig. 3E, Suppl. Table 1, 2 and Methods**). To assess the  
321 inhibitory potential of these factors, we treated CD142- ASPCs with various concentrations of  
322 recombinant candidate proteins, aiming to mimic the physiological presence of Aregs. Similar  
323 to the above-described experiments, the extent of adipogenesis was inherently variable  
324 across distinct assays and cell populations. Nevertheless, both recombinant CD142 (p-adj <  
325 0.001) and GDF10 (p-adj < 0.001) significantly inhibited adult-derived CD142- ASPC  
326 adipogenesis at a concentration of 100 ng/ml, while recombinant MGP inhibited adipogenesis  
327 at 1 µg/ml (p-adj < 0.001) (**Fig. 3F-G, Suppl. Fig. 15 and 16, Methods**). Interestingly, P0-  
328 derived CD142- ASPCs appeared to a large extent refractory to such an inhibition, illustrated  
329 by a much less striking decrease in the extent of adipogenesis upon treatment with  
330 recombinant EGF, a well-established adipogenesis inhibitor (Harrington, Pond-Tor and  
331 Boney, 2007) that was used as a positive control (**Suppl. Fig. 17, Methods**). Nevertheless,  
332 we still observed a significant decrease in the extent of adipogenesis when newborn CD142-  
333 ASPCs were exposed to recombinant CD142, GDF10, MGP and BGN (p-adj < 0.01, < 0.01,

334 < 0.001 and < 0.05 respectively), with MGP now exerting the most pronounced inhibitory effect  
335 on differentiating newborn-derived CD142– ASPCs (**Suppl. Fig. 17**).

336

337 Amongst other Areg candidates, we also identified a few retinoic acid (RA)-related genes  
338 including *Aldh1a2*, *Epha3*, *Osr1* and *Rbp1* (**Fig. 3H**, **Suppl. Fig. 18**, **Suppl. Table 1**,  
339 **Methods**). Their specificity to CD142+ ASPCs raises the possibility that this pathway could  
340 also be implicated in the anti-adipogenic character of Aregs. This is further supported by the  
341 significant enrichment of the GO term “retinol metabolic process” (GO:0042572) (with retinol  
342 being a precursor of RA) in transcriptomic and proteomic data from freshly isolated CD142+  
343 compared to CD142– ASPCs (**Fig. 3I**, **Suppl. Fig. 19A-B**). We further uncovered that  
344 transcriptomic data from cultured CD142+ ASPCs treated with standard white adipogenic  
345 cocktail is enriched for the “cellular response to RA” (GO:0071300) and “RA receptor signalling  
346 pathway” (GO:0048384) terms compared to CD142– ASPCs post-differentiation (**Suppl. Fig.**  
347 **19C-D**, **Suppl. Fig. 20**). Given that RA has been previously shown to inhibit adipogenesis of  
348 3T3 cells (Murray and Russell, 1980), these findings suggest that Aregs might auto-suppress  
349 their own adipogenic differentiation capacity by actively responding to RA. To test the  
350 functional implication of RA in Aregs’ inhibitory properties, we treated CD142– ASPCs with  
351 RA (**Methods**) and observed a significant decrease ( $p\text{-adj} < 0.001$ ) in the extent of  
352 adipogenesis (from 0.1  $\mu\text{M}$  RA, **Fig. 3J-K**, **Suppl. Fig. 21**). Together, these findings suggest  
353 that the inhibitory character of Aregs might be mediated *via* RA signalling in concert with other  
354 factors such as CD142, GDF10 and MGP.

355

#### 356 **Molecular (auto-)regulation of Areg-mediated inhibitory activity**

357 To validate the involvement of factors shown implicated in the inhibitory nature of CD142+  
358 ASPCs on adipogenesis, i.e. *F3* (CD142), *Mgp*, *Gdf10* and *Aldh1a2*, we first knocked the  
359 respective genes down in adult CD142+ and total ASPCs in an siRNA-dependent manner and  
360 examined its impact on adipogenesis. We observed that for each of these four genes, their  
361 respective knockdown (KD) lead to a variable but consistent increase of adipogenic propensity  
362 both in CD142+ and total ASPCs, with more pronounced effects in the total ASPC population  
363 (**Suppl. Fig. 22**, **Methods**). Indeed, we found that siRNA-mediated changes in lipid  
364 accumulation in CD142+ ASPCs were small, suggesting an inherent inability of these cells to  
365 give rise to adipocytes, at least in the imposed culturing conditions. Given the Areg-specific  
366 (among ASPCs) expression of *F3*, *Mgp*, *Gdf10* and *Aldh1a2* genes, we interpret the increase  
367 of total ASPC adipogenesis upon knockdown of these respective genes as a consequence of  
368 specifically inactivating Areg function. To support this interpretation in a more rigorous way,  
369 we performed transwell assays, allowing CD142– ASPCs to be exposed to the secretome of  
370 CD142+ ASPCs in which the respective candidate factors were knocked down. We observed  
371 that inactivating all four genes caused an increased adipogenesis of co-cultured CD142–  
372 ASPCs compared to control (scr siRNA), suggesting that they are indeed involved in the  
373 inhibitory activity of Aregs. However, while we observed that *F3* and *Mgp* inactivation caused  
374 a dramatic increase in overall differentiation of CD142– ASPCs ( $p\text{-adj} < 0.01$  and  $< 0.01$   
375 respectively, **Fig. 4A-B**, **Suppl. Fig. 22H-I**), *Gdf10* and *Aldh1a2* KD had a lower effect ( $p\text{-adj}$   
376 = 0.052 for *Gdf10*,  $p\text{-adj} = 0.029$  for *Aldh1a2*).

377

378 To further characterise the molecular mechanism(s) underlying the observed Areg-mediated  
379 inhibitory signalling, we profiled the transcriptomes of CD142– ASPCs responding to CD142+  
380 ASPCs, whose activity was modulated *via* individual knockdowns (**Suppl. Table 2**). We  
381 observed that the respective gene expression profiles reflected the image-based

382 differentiation results to a great extent, with adipogenic propensity differences driving the first  
383 principal component (PC1) and correlating with the overall transcriptomics-based “white fat  
384 cell differentiation score” (GO:0050872) (**Fig. 4C, Suppl. Fig. 23A-B**). Interestingly, distinct  
385 CD142- ASPC samples grouped as a function of how effectively they were impacted by  
386 CD142+ ASPC signalling, forming two clusters corresponding to “active Areg” signalling  
387 (CD142- ASPCs co-cultured with si*Gdf10*, si*Aldh1a2*, as well as WT and scr Aregs) and what  
388 we interpret as “dysfunctional Areg” signalling (co-cultured with si*F3*, si*Mgp* Aregs and with an  
389 empty transwell, **Fig. 4C-E**). Furthermore, we found that in CD142- ASPCs that responded to  
390 “active Aregs”, the expression of most top CD142+ markers (i.e. Areg-specific markers)  
391 including *F3*, *Bgn*, *Rbp1*, *Osr1*, *Cpe*, *Mgp* and *Gdf10* is higher compared to the other CD142-  
392 ASPC samples, suggesting that the molecular state of CD142- ASPCs that were exposed to  
393 “active Aregs” became itself more Areg-like (**Fig. 4D, Suppl. Fig. 23C**). To test this hypothesis,  
394 we integrated transcriptomic profiles of CD142- and CD142+ ASPCs that were on their own  
395 exposed to an adipogenic cocktail for 6-8 days (**Suppl. Table 2**) into the analysis of bulk RNA-  
396 seq data derived from CD142- ASPCs that were co-cultured with distinct KD CD142+ ASPCs.  
397 Remarkably, post-differentiation CD142+ and CD142- ASPCs fell into the two distinct clusters  
398 corresponding to “active” and “dysfunctional Aregs” respectively, indicating that the CD142+  
399 ASPCs were transcriptionally similar to CD142- ASPCs that were exposed to “active Aregs”  
400 (**Fig. 4E-D, Suppl. Fig. 23D**). Furthermore, we observed a strong anti-correlation between the  
401 Areg *versus* “white fat cell differentiation” signatures inferred from all the considered samples  
402 (**Fig. 4F, Suppl. Fig. 23A and C, Suppl. Table 1**). Specifically, we found that the expression  
403 of most top Areg markers, and particularly those of all tested candidates, strongly anti-  
404 correlated with the “white fat cell differentiation score” (**Fig. 4G, Suppl. Fig. 23E, Methods**).  
405 Our findings therefore point to a strong association between Areg marker (**Suppl. Table 1**)  
406 expression (especially of the tested candidates) and the inability of ASPCs to undergo  
407 adipogenic differentiation.

408  
409 Finally, we aimed to provide additional evidence that the effect of functional Aregs on  
410 differentiating CD142- ASPCs is at least in part regulated by RA signalling-related genes.  
411 Remarkably, the “cellular response to RA” (GO:0071300) and “RA receptor signalling  
412 pathway” (GO:0048384) terms were enriched in CD142- ASPCs subjected to “active Areg”  
413 signalling (**Suppl. Fig. 23F-G**), and the expression of the genes involved in these two terms  
414 were anti-correlated with “white fat cell differentiation score” (**Fig. 4G-I, Suppl. Fig. 23A, F**  
415 **and G**). To further demonstrate the involvement of RA signalling in this Areg-mediated  
416 inhibitory effect, we performed bulk RNA-seq of CD142- ASPCs treated with RA or EGF in  
417 order to compare their gene expression profiles to those of CD142- ASPCs that were co-  
418 cultured with “active Aregs”. This analysis revealed that CD142- ASPCs that were exposed  
419 to “active Aregs” were transcriptionally more similar to CD142- ASPCs treated with RA than  
420 those treated with EGF (**Suppl. Fig. 24**). In addition, we observed that the receiving CD142-  
421 ASPCs exhibited remarkably coherent transcriptional dynamics of a number of genes and  
422 pathways that were previously reported to be involved in the RA-mediated inhibition of  
423 adipogenesis, a pattern of expression supported by the analysis of CD142- ASPCs treated  
424 with RA. Specifically, Wnt signalling pathway-related terms, RA receptors (*Rarb* and *Rarg*) as  
425 well as Catenin beta-1 (*Ctnnb*) were enriched upon the Areg-mediated inhibition of  
426 differentiating CD142- ASPCs (**Suppl. Fig. 25**), consistent with previously reported findings  
427 on the effect of RA on preadipocytes (Goldstein, Scalia and Ma, 2009; Kim *et al.*, 2013).  
428 Moreover, CD142- ASPCs exposed to the secretome of CD142+ ASPCs during adipogenic  
429 differentiation showed a decreased expression (compared to CD142- ASPCs being exposed

430 to “dysfunctional” or no Aregs) of a substantial collection of genes reported to be  
431 downregulated in RA-mediated adipogenesis suppression, namely *Rxra*, (Sagara *et al.*, 2013),  
432 *Pparg*, *Cebpa* (Schwartz *et al.*, 1996), *Mapk14* (Lee *et al.*, 2011), *Zfp423* (Wang *et al.*, 2017)  
433 and *Asct2* (Takahashi *et al.*, 2015) (**Suppl. Fig. 25**). Conversely, the expression of genes  
434 involved in the EGF-mediated inhibition of adipogenesis, *Erk1* (MAPK3), *Erk2* (MAPK1) and  
435 *Prkaca* (PKA C alpha) (Boney, Smith and Gruppuso, 1998; MacDougald and Mandrup, 2002;  
436 Harrington, Pond-Tor and Boney, 2007) did not show substantial changes in CD142– ASPCs  
437 that were exposed to “active Aregs” compared to CD142– ASPCs exposed to “dysfunctional  
438 Aregs” (**Suppl. Fig. 25**). Finally, we found that RA-treated CD142– ASPCs, next to an  
439 impaired adipogenic capacity (**Fig. 3J-K**), exhibit also a strikingly consistent transcriptomic  
440 signature, with a number of highly specific Areg markers being regulated by RA in a  
441 concentration-dependent manner. Indeed, we observed that the expression of *F3* and *Mgp*  
442 but also of *Cpe*, *Gdf10*, *Bgn* and *Clec11a* and other Areg-specific genes is gradually  
443 upregulated by increasing concentrations of RA (**Fig. 4J, Suppl. Fig. 26**). However, for a  
444 number of genes (*F3*, *Mgp*, *Bgn*, *Clec11a*), RA administered at concentrations higher than 10  
445  $\mu\text{M}$  tended to reverse this up-regulation, potentially pointing to a specific RA concentration  
446 range (0.01-1  $\mu\text{M}$ ) that may be physiologically relevant for the Areg-dependent inhibition of  
447 adipogenesis. Together, these findings strongly suggest that the RA signalling pathway plays  
448 an important role in mediating the inhibitory activity of Aregs through a synchronised regulation  
449 of Areg-specific genes.

## 450 Discussion

451 In this study, we systematically examined the molecular and phenotypic properties of murine  
452 subcutaneous CD142+ ASPCs, motivated by the reported discrepancy regarding their  
453 behaviour in the context of adipogenesis (Schwalie *et al.*, 2018; Hwang and Kim, 2019; Merrick  
454 *et al.*, 2019; Corvera, 2021). Using numerous functional and multi-omic assays across distinct  
455 experimental settings and sampling conditions, we unambiguously validated the previously  
456 proposed non-adipogenic and anti-adipogenic nature of these cells, which is why we suggest  
457 to retain their initially proposed name: “Aregs” for adipogenesis regulators (**Fig. 1** and **Suppl.**  
458 **Fig. 1-9**).

459  
460 These analyses also led to unexpected findings regarding in particular the age-dependent  
461 nature of CD142+ ASPCs’ functional properties. It has been shown that the developmental  
462 timing of adipose tissue formation varies largely between species (Carberry, Colditz and  
463 Lingwood, 2010; Louveau *et al.*, 2016) and different anatomical fat depots (Birsoy *et al.*, 2011;  
464 Han *et al.*, 2011; Rosen and Spiegelman, 2014; Hong *et al.*, 2015). Subcutaneous stromal  
465 vascular fraction (SVF) cells were shown to be capable of differentiating into lipid-filled  
466 adipocytes *in vitro* under adipogenic differentiation medium from embryonic day E16.5 (Birsoy  
467 *et al.*, 2011). However, the dynamics of post-natal ASPC differentiation, as well as the  
468 emergence of their cellular heterogeneity, are still poorly understood. Having experimentally  
469 investigated diverse murine post-natal developmental stages, we found that all fractions of  
470 newborn (P0) ASPCs displayed a molecular identity and behaviour (high proliferative and  
471 adipogenic propensity) that resemble those of “naïve preadipocytes” (**Suppl. Fig. 12**) (Wang  
472 *et al.*, 2003; Atanassova, Rancic and Georgieva, 2012; Hong *et al.*, 2015; Hepler and Gupta,  
473 2017). Importantly, P0-derived CD142+ ASPCs did not show a higher “Areg/CD142+ score”  
474 (**Suppl. Table 1, Fig. 2G-H, Suppl. Fig. 14**) nor higher expression of “retinol metabolic  
475 process”-related genes (**Suppl. Fig. 13**) compared to the other tested ASPC fractions. This is  
476 consistent with the notion that all P0 ASPCs are likely still naïve and indicates that the  
477 mesenchymal cellular landscape that is observed in adults has not yet been established in  
478 newborns. Further inquiry revealed an age-dependent evolution of both the molecular  
479 signature as well as the diverse adipogenic phenotypes of ASPCs. Indeed, we found that the  
480 Areg-specific molecular characteristics emerge in CD142+ ASPCs before P16, consistent with  
481 their detection in P12 scRNA-seq data (Merrick *et al.*, 2019) and become most prominent in  
482 adulthood (**Fig. 2A, Suppl. Fig. 10**). Interestingly however, the non- and anti-adipogenic  
483 phenotype of CD142+ ASPCs only emerged between post-natal day 16 and 28 (4wo), thus  
484 after the establishment of their molecular identity, with, intriguingly, the weaning of the litters  
485 occurring during this time period (**Fig. 2D-E**). We cannot formally point to weaning as the  
486 primary causal factor for the observed timing offset between Aregs’ molecular and functional  
487 appearance. Yet, the fact that weaning entails a dramatic nutritional alteration makes it an  
488 intriguing candidate for further investigation.

489  
490 While the observed adipogenic phenotype of pre-weaning CD142+ ASPCs is rather striking,  
491 it still does not fully resolve the reported functional discrepancy for CD142+ ASPCs given that  
492 an adipogenic propensity has also been reported for adult CD142+ APSCs (Merrick *et al.*,  
493 2019), which contrasts with our results. Amongst remaining possible reasons for this  
494 discrepancy is genetic background. Indeed, Merrick and colleagues used CD1 as opposed to  
495 C57BL/6J mice used in other studies, including our own (Burl *et al.*, 2018; Hepler *et al.*, 2018;  
496 Schwalie *et al.*, 2018; The Tabula Muris Consortium *et al.*, 2018; Cho, Lee and Doles, 2019;

497 Zhang *et al.*, 2019; Sárvári *et al.*, 2021). Metabolic variation as a function of genetic  
498 background is widely recognized in the field (Fontaine and Davis, 2016). Yet, how ASPC  
499 heterogeneity and function may vary across individuals / strains has not yet been investigated  
500 and will thus constitute an exciting downstream research avenue.

501

502 Given the demonstrated non-adipogenic and inhibitory properties of Aregs, understanding  
503 how these functional properties are molecularly regulated is highly relevant. Since our findings  
504 demonstrated that Aregs exert their inhibitory properties *via* paracrine signalling, we focused  
505 on genes coding for secreted factors. We identified six candidates that were specific to Aregs  
506 across multi-omic datasets: *F3* (coding for CD142) itself, *Mgp*, *Gdf10*, *Clec11a*, *Cpe* and *Bgn*,  
507 with CD142 and MGP the most interesting functionally, based on recombinant protein as well  
508 as knockdown assays (**Fig. 3F-G**, **Suppl. Fig. 16**, **Fig. 4A-B**). The involvement of CD142 in  
509 Aregs' inhibitory activity is surprising given the reported physiological role of CD142 as a  
510 coagulation factor (Chu, 2011). CD142, also known as Tissue factor, is the primary initiator in  
511 the extrinsic coagulation pathway (Petersen, Valentin and Hedner, 1995) and has not been  
512 explicitly shown to be involved in adipogenesis-related processes. MGP (Matrix Gla protein,  
513 a member of a family of vitamin-K2 dependent, Gla-containing proteins) has been  
514 demonstrated to act as an inhibitor of calcification in cartilage and vasculature (Bäck *et al.*,  
515 2019), implying its possible specificity to mesenchymal cells with multilineage potential.  
516 Finally, while the inhibitory effect of GDF10 has been previously demonstrated in the context  
517 of adipogenesis in Areg-like/CD142+ muscle-resident stromal cells (Camps *et al.*, 2020) as  
518 well as in differentiating 3T3-L1 cells (Hino *et al.*, 2012), we found that inactivating *Gdf10* in  
519 Aregs did not majorly interfere with their inhibitory activity towards other ASPCs.

520

521 Next to these secretory proteins, we uncovered the RA-signalling pathway as another likely  
522 actor that is involved in the Areg-mediated inhibition of adipogenesis. Retinoic acid has long  
523 been linked to adipogenic inhibition (Murray and Russell, 1980; Kuri-Harcuch, 1982; Salazar-  
524 Olivo *et al.*, 1994; Schwartz *et al.*, 1996; Lee *et al.*, 2011; Sagara *et al.*, 2013; Wang *et al.*,  
525 2017) and demonstrated to be protective against diet-induced obesity (Berry and Noy, 2009;  
526 Bonet, Ribot and Palou, 2012). Throughout our analyses, we identified a substantial number  
527 of genes related to RA signalling to be specific to Aregs and some of them, including *Aldh1a2*,  
528 *Epha3*, *Osr1* and *Rbp1* are *bona fide* Areg markers (**Fig. 3H**, **Suppl. Fig. 18**). Furthermore,  
529 transcriptomic profiling of freshly isolated Aregs suggests that they produce retinol (**Fig. 4I**,  
530 **Suppl. Fig. 19A-B**), a precursor of RA. In addition, RA-related terms, particularly “cellular  
531 response to RA” and “RA receptor signalling pathway” were enriched in CD142- ASPCs that  
532 were subjected to active Areg signalling (**Fig. 4I**, **Suppl. Fig. 4A**, **Suppl. Fig. 19C-D**).  
533 Together, these results suggest that Aregs might exert their anti-adipogenic activity *via* RA  
534 itself, as further supported by the remarkably coherent transcriptional dynamics of a set of  
535 genes involved in RA-mediated inhibition in CD142- ASPCs exposed to active Aregs. For  
536 example, we found that Areg-treated CD142- ASPCs were transcriptionally more similar to  
537 CD142- ASPCs treated with RA than those treated with EGF, another well-established  
538 adipogenesis inhibitor (**Fig. 4J**, **Suppl. Figs. 24-25**) (Harrington, Pond-Tor and Boney, 2007).  
539 This transcriptional similarity reflects a more general, intriguing phenomenon in that Areg-  
540 treated CD142- ASPCs exhibited a significantly increased expression of many Areg-specific  
541 genes, a number of which were also upregulated in RA-treated CD142- ASPCs (**Fig. 4D-G**,  
542 **Suppl. Fig. 26**). These results point to a potential conversion of CD142- ASPCs, when  
543 subjected to inhibitory signals, into Areg-like cells, a phenomenon of interconversion of various

544 ASPC subpopulations that has been recently proposed to occur within the subcutaneous  
545 adipogenic stem cell niche (Merrick *et al.*, 2019). It is thereby worth noting that the  
546 transcriptome of Aregs exposed to adipogenic cocktail also showed a response to RA (**Suppl.**  
547 **Fig. 19C-D**), suggesting that they exert an auto-inhibitory effect that may impair their own  
548 ability of generating *in vitro* adipocytes.

549  
550 In conclusion, our findings systematically authenticated Aregs as a molecularly, phenotypically  
551 and functionally robust inhibitory subpopulation of murine subcutaneous ASPCs. This  
552 subpopulation emerges within the ASPCs during early stages of post-natal development. The  
553 establishment of the molecular signature of Aregs precedes the manifestation of their  
554 phenotypic (non-adipogenic) and functional (anti-adipogenic) properties, with those two  
555 events being separated by weaning. We finally uncovered that the murine Areg-mediated  
556 inhibition of adipogenesis involves the secreted factors CD142 (encoded by *F3*) and Matrix  
557 Gla protein (MGP), which act together with the RA signalling pathway. This set of factors  
558 seems at first glance unrelated, but intriguingly, the expression of *F3* and *Mgp* (as well as  
559 *Aldh1a2* and *Bgn*), has already been shown to be regulated by retinoic acid (Balmer and  
560 Blomhoff, 2002; Takeda *et al.*, 2016) as we also demonstrated for these and other Areg-  
561 specific markers (**Fig. 4J**, **Suppl. Fig. 26**). Furthermore, these genes were reported to be  
562 higher expressed in visceral compared to subcutaneous ASPCs and have as such been  
563 associated with the impaired capacity of visceral ASPCs to give rise to *in vitro* adipocytes  
564 (Reichert *et al.*, 2011; Meissburger *et al.*, 2016; Takeda *et al.*, 2016; Li *et al.*, 2020). Further  
565 studies will now be required to investigate how this seemingly diverse collection of molecules  
566 may cooperate within the retinoic acid signalling pathway to steer the developmental,  
567 phenotypic and functional properties of Aregs.

## 568 **References**

- 569 Alpern, D. *et al.* (2019) 'BRB-seq: ultra-affordable high-throughput transcriptomics enabled  
570 by bulk RNA barcoding and sequencing', *Genome Biology*, 20(1), p. 71. doi:  
571 10.1186/s13059-019-1671-x.
- 572 Atanassova, P., Rancic, G. and Georgieva, E. (2012) 'Morphological Characteristics of  
573 Neonatal Adipose Tissue', *Folia Biologica*, 60(1), pp. 41–43. doi: 10.3409/fb60\_1-2.41-43.
- 574 Bäck, M. *et al.* (2019) 'Endogenous Calcification Inhibitors in the Prevention of Vascular  
575 Calcification: A Consensus Statement From the COST Action EuroSoftCalcNet', *Frontiers in*  
576 *Cardiovascular Medicine*, 5, p. 196. doi: 10.3389/fcvm.2018.00196.
- 577 Balmer, J. E. and Blomhoff, R. (2002) 'Gene expression regulation by retinoic acid', *Journal*  
578 *of Lipid Research*, 43(11), pp. 1773–1808. doi: 10.1194/jlr.R100015-JLR200.
- 579 Berry, D. C. and Noy, N. (2009) 'All-trans-Retinoic Acid Represses Obesity and Insulin  
580 Resistance by Activating both Peroxisome Proliferation-Activated Receptor  $\beta/\delta$  and Retinoic  
581 Acid Receptor', *Molecular and Cellular Biology*, 29(12), pp. 3286–3296. doi:  
582 10.1128/MCB.01742-08.
- 583 Birsoy, K. *et al.* (2011) 'Analysis of gene networks in white adipose tissue development  
584 reveals a role for ETS2 in adipogenesis', *Development*, 138(21), pp. 4709–4719. doi:  
585 10.1242/dev.067710.
- 586 Bonet, M. L., Ribot, J. and Palou, A. (2012) 'Lipid metabolism in mammalian tissues and its  
587 control by retinoic acid', *Biochimica et Biophysica Acta (BBA) - Molecular and Cell Biology of*  
588 *Lipids*, 1821(1), pp. 177–189. doi: 10.1016/j.bbalip.2011.06.001.
- 589 Boney, C. M., Smith, R. M. and Gruppuso, P. A. (1998) 'Modulation of Insulin-Like Growth  
590 Factor I Mitogenic Signaling in 3T3-L1 Preadipocyte Differentiation', 139(4), p. 7.
- 591 Burl, R. B. *et al.* (2018) 'Deconstructing Adipogenesis Induced by  $\beta 3$ -Adrenergic Receptor  
592 Activation with Single-Cell Expression Profiling', *Cell Metabolism*, 28(2), pp. 300-309.e4. doi:  
593 10.1016/j.cmet.2018.05.025.
- 594 Camps, J. *et al.* (2020) 'Interstitial Cell Remodeling Promotes Aberrant Adipogenesis in  
595 Dystrophic Muscles', *Cell Reports*, 31(5), p. 107597. doi: 10.1016/j.celrep.2020.107597.
- 596 Carberry, A. E., Colditz, P. B. and Lingwood, B. E. (2010) 'Body Composition From Birth to  
597 4.5 Months in Infants Born to Non-Obese Women', *Pediatric Research*, 68(1), pp. 84–88.  
598 doi: 10.1203/PDR.0b013e3181df5421.
- 599 Cho, D. S., Lee, B. and Doles, J. D. (2019) 'Refining the adipose progenitor cell landscape in  
600 healthy and obese visceral adipose tissue using single-cell gene expression profiling', *Life*  
601 *Science Alliance*, 2(6), p. e201900561. doi: 10.26508/lsa.201900561.
- 602 Chu, A. J. (2011) 'Tissue Factor, Blood Coagulation, and Beyond: An Overview',  
603 *International Journal of Inflammation*, 2011, pp. 1–30. doi: 10.4061/2011/367284.
- 604 Cleal, L., Aldea, T. and Chau, Y.-Y. (2017) 'Fifty shades of white: Understanding  
605 heterogeneity in white adipose stem cells', *Adipocyte*, 6(3), pp. 205–216. doi:  
606 10.1080/21623945.2017.1372871.
- 607 Corvera, S. (2021) 'Cellular Heterogeneity in Adipose Tissues', *Annual Review of*  
608 *Physiology*, 83(1), pp. 257–278. doi: 10.1146/annurev-physiol-031620-095446.



- 609 Cristancho, A. G. and Lazar, M. A. (2011) 'Forming functional fat: a growing understanding  
610 of adipocyte differentiation', *Nature Reviews Molecular Cell Biology*, 12(11), pp. 722–734.  
611 doi: 10.1038/nrm3198.
- 612 Ferrero, R., Rainer, P. and Deplancke, B. (2020) 'Toward a Consensus View of Mammalian  
613 Adipocyte Stem and Progenitor Cell Heterogeneity', *Trends in Cell Biology*, 30(12), pp. 937–  
614 950. doi: 10.1016/j.tcb.2020.09.007.
- 615 Fontaine, D. A. and Davis, D. B. (2016) 'Attention to Background Strain Is Essential for  
616 Metabolic Research: C57BL/6 and the International Knockout Mouse Consortium', *Diabetes*,  
617 65(1), pp. 25–33. doi: 10.2337/db15-0982.
- 618 Goldstein, B. J., Scalia, R. G. and Ma, X. L. (2009) 'Protective vascular and myocardial  
619 effects of adiponectin', *Nature Clinical Practice Cardiovascular Medicine*, 6(1), pp. 27–35.  
620 doi: 10.1038/ncpcardio1398.
- 621 Gu, W. *et al.* (2019) 'Single-Cell RNA-Sequencing and Metabolomics Analyses Reveal the  
622 Contribution of Perivascular Adipose Tissue Stem Cells to Vascular Remodeling',  
623 *Arteriosclerosis, Thrombosis, and Vascular Biology*, 39(10), pp. 2049–2066. doi:  
624 10.1161/ATVBAHA.119.312732.
- 625 Han, J. *et al.* (2011) 'The spatiotemporal development of adipose tissue', *Development*,  
626 138(22), pp. 5027–5037. doi: 10.1242/dev.067686.
- 627 Harrington, M., Pond-Tor, S. and Boney, C. M. (2007) 'Role of Epidermal Growth Factor and  
628 ErbB2 Receptors in 3T3-L1 Adipogenesis\*', *Obesity*, 15(3), pp. 563–571. doi:  
629 10.1038/oby.2007.562.
- 630 Hepler, C. *et al.* (2018) 'Identification of functionally distinct fibro-inflammatory and  
631 adipogenic stromal subpopulations in visceral adipose tissue of adult mice', *eLife*, 7, p.  
632 e39636. doi: 10.7554/eLife.39636.
- 633 Hepler, C. and Gupta, R. K. (2017) 'The expanding problem of adipose depot remodeling  
634 and postnatal adipocyte progenitor recruitment', *Molecular and Cellular Endocrinology*, 445,  
635 pp. 95–108. doi: 10.1016/j.mce.2016.10.011.
- 636 Hino, J. *et al.* (2012) 'Bone morphogenetic protein-3b (BMP-3b) is expressed in adipocytes  
637 and inhibits adipogenesis as a unique complex', *International Journal of Obesity*, 36(5), pp.  
638 725–734. doi: 10.1038/ijo.2011.124.
- 639 Hong, K. Y. *et al.* (2015) 'Perilipin + embryonic preadipocytes actively proliferate along  
640 growing vasculatures for adipose expansion', *Development*, 142(15), pp. 2623–2632. doi:  
641 10.1242/dev.125336.
- 642 Hwang, I. and Kim, J. B. (2019) 'Two Faces of White Adipose Tissue with Heterogeneous  
643 Adipogenic Progenitors', *Diabetes & Metabolism Journal*, 43(6), p. 752. doi:  
644 10.4093/dmj.2019.0174.
- 645 Kim, D. M. *et al.* (2013) 'Retinoic acid inhibits adipogenesis via activation of Wnt signaling  
646 pathway in 3T3-L1 preadipocytes', *Biochemical and Biophysical Research Communications*,  
647 434(3), pp. 455–459. doi: 10.1016/j.bbrc.2013.03.095.
- 648 Kuri-Harcuch, W. (1982) 'Differentiation of 3T3-F442A Cells into Adipocytes is Inhibited by  
649 Retinoic Acid', *Differentiation*, 23(1–3), pp. 164–169. doi: 10.1111/j.1432-  
650 0436.1982.tb01279.x.

- 651 Lee, J. S. *et al.* (2011) 'Retinoic acid inhibits BMP4-induced C3H10T1/2 stem cell  
652 commitment to adipocyte via downregulating Smad/p38MAPK signaling', *Biochemical and*  
653 *Biophysical Research Communications*, 409(3), pp. 550–555. doi:  
654 10.1016/j.bbrc.2011.05.042.
- 655 Lee, K. Y. *et al.* (2019) 'Developmental and functional heterogeneity of white adipocytes  
656 within a single fat depot', *The EMBO Journal*, 38(3). doi: 10.15252/embj.201899291.
- 657 Li, C. *et al.* (2020) 'Matrix Gla protein regulates adipogenesis and is serum marker of  
658 visceral adiposity', *Adipocyte*, 9(1), pp. 68–76. doi: 10.1080/21623945.2020.1721692.
- 659 Louveau, I. *et al.* (2016) 'Invited review: Pre- and postnatal adipose tissue development in  
660 farm animals: from stem cells to adipocyte physiology', *Animal*, 10(11), pp. 1839–1847. doi:  
661 10.1017/S1751731116000872.
- 662 MacDougald, O. A. and Mandrup, S. (2002) 'Adipogenesis: forces that tip the scales',  
663 *Trends in Endocrinology & Metabolism*, 13(1), pp. 5–11. doi: 10.1016/S1043-  
664 2760(01)00517-3.
- 665 Meissburger, B. *et al.* (2016) 'Regulation of adipogenesis by paracrine factors from adipose  
666 stromal-vascular fraction - a link to fat depot-specific differences', *Biochimica et Biophysica*  
667 *Acta (BBA) - Molecular and Cell Biology of Lipids*, 1861(9), pp. 1121–1131. doi:  
668 10.1016/j.bbalip.2016.06.010.
- 669 Merrick, D. *et al.* (2019) 'Identification of a mesenchymal progenitor cell hierarchy in adipose  
670 tissue', *Science*, 364(6438), p. eaav2501. doi: 10.1126/science.aav2501.
- 671 Murray, T. and Russell, T. R. (1980) 'Inhibition of adipose conversion in 3T3-L2 cells by  
672 retinoic acid'. *J Supramol Struct*, 14(2):255-266. doi:10.1002/jss.400140214  
673
- 674 Petersen, L. C., Valentin, S. and Hedner, U. (1995) Regulation of the extrinsic pathway  
675 system in health and disease: the role of factor Vha and tissue factor pathway inhibitor',  
676 79(1), p. 47.
- 677 Reichert, B. *et al.* (2011) 'Concerted Action of Aldehyde Dehydrogenases Influences Depot-  
678 Specific Fat Formation', *Molecular Endocrinology*, 25(5), pp. 799–809. doi:  
679 10.1210/me.2010-0465.
- 680 Rosen, E. D. and Spiegelman, B. M. (2014) 'What We Talk About When We Talk About Fat',  
681 *Cell*, 156(1–2), pp. 20–44. doi: 10.1016/j.cell.2013.12.012.
- 682 Sagara, C. *et al.* (2013) 'Molecular mechanism of 9-cis-retinoic acid inhibition of  
683 adipogenesis in 3T3-L1 cells', *Biochemical and Biophysical Research Communications*,  
684 433(1), pp. 102–107. doi: 10.1016/j.bbrc.2013.02.057.
- 685 Salazar-Olivo, L. A. *et al.* (1994) 'Inhibition of 3T3 adipogenesis by retinoic acid is not  
686 mediated by cytoplasmic retinoic acid-binding protein', *Biochem Biophys Res Commun*,  
687 204(1):257-263. doi:10.1006/bbrc.1994.2453  
688
- 689 Sárvári, A. K. *et al.* (2021) 'Plasticity of Epididymal Adipose Tissue in Response to Diet-  
690 Induced Obesity at Single-Nucleus Resolution', *Cell Metabolism*, 33(2), pp. 437-453.e5. doi:  
691 10.1016/j.cmet.2020.12.004.
- 692 Schwalie, P. C. *et al.* (2018) 'A stromal cell population that inhibits adipogenesis in  
693 mammalian fat depots', *Nature*, 559(7712), pp. 103–108. doi: 10.1038/s41586-018-0226-8.

- 694 Schwartz, M. W. *et al.* (1996) 'Specificity of Leptin Action on Elevated Blood Glucose Levels  
695 and Hypothalamic Neuropeptide Y Gene Expression in ob/ob Mice', 45, p. 5.
- 696 Shamsi, F., Tseng, Y.-H. and Kahn, C. R. (2021) 'Adipocyte Microenvironment: Everybody in  
697 the Neighborhood Talks about the Temperature', *Cell Metabolism*, 33(1), pp. 4–6. doi:  
698 10.1016/j.cmet.2020.12.012.
- 699 Spallanzani, R. G. *et al.* (2019) 'Distinct immunocyte-promoting and adipocyte-generating  
700 stromal components coordinate adipose tissue immune and metabolic tenors', *Science*  
701 *Immunology*, 4(35), p. eaaw3658. doi: 10.1126/sciimmunol.aaw3658.
- 702 Takahashi, K. *et al.* (2015) 'Inhibition of ASCT2 is essential in all- *trans* retinoic acid-induced  
703 reduction of adipogenesis in 3T3-L1 cells', *FEBS Open Bio*, 5(1), pp. 571–578. doi:  
704 10.1016/j.fob.2015.06.012.
- 705 Takeda, K. *et al.* (2016) 'Retinoic Acid Mediates Visceral-Specific Adipogenic Defects of  
706 Human Adipose-Derived Stem Cells', *Diabetes*, 65(5), pp. 1164–1178. doi: 10.2337/db15-  
707 1315.
- 708 The Tabula Muris Consortium *et al.* (2018) 'Single-cell transcriptomics of 20 mouse organs  
709 creates a Tabula Muris', *Nature*, 562(7727), pp. 367–372. doi: 10.1038/s41586-018-0590-4.
- 710 Wang, B. *et al.* (2017) 'Retinoic acid inhibits white adipogenesis by disrupting GADD45A-  
711 mediated Zfp423 DNA demethylation', *Journal of Molecular Cell Biology*, 9(4), pp. 338–349.  
712 doi: 10.1093/jmcb/mjx026.
- 713 Wang, C. *et al.* (2003) 'Cyclin D1 Repression of Peroxisome Proliferator-Activated Receptor  
714 // Expression and Transactivation', *MOL. CELL. BIOL.*, 23, p. 15.
- 715 Zhang, Z. *et al.* (2019) 'Dermal adipose tissue has high plasticity and undergoes reversible  
716 dedifferentiation in mice', *Journal of Clinical Investigation*, 129(12), pp. 5327–5342. doi:  
717 10.1172/JCI1130239.

718 **Acknowledgements**

719 We thank W. Chen, G. van Mierlo and Judith F. Kribelbauer for constructive discussions and  
720 careful reading of the manuscript. This research was supported by the Swiss National Science  
721 Foundation Grants (#31003A\_162735, 31003A\_182655, and CRSII5\_186271), the Precision  
722 and Health-related Technologies Initiative Grants (PHRT #222, #307, and #502) and by  
723 institutional support from the Swiss Federal Institute of Technology in Lausanne (EPFL). We  
724 thank the EPFL Core Facilities: CPG (Centre de phéno génomique, especially Arnaud Legay),  
725 FCCF (Flow Cytometry Core Facility, especially Miguel Garcia), BIOP (BioImaging and Optics  
726 Platform, especially Olivier Buri and Romain Guiet), PCF (Proteomics Core Facility, especially  
727 Romain Hamelin and Florence Armand), GECF (Gene Expression Core Facility, especially  
728 Bastien Mangeat).

729

730 **Author contributions**

731 B.D., M.Z. and P.Y.R. designed the study and wrote the manuscript. M.Z. and P.Y.R.  
732 conducted the experiments and analyses: M.Z. performed all the experimental assays  
733 including murine SVF extraction, FACS-based isolation, cell culture experiments, imaging,  
734 image analyses and quantification. P.Y.R. performed all single-cell-, bulk RNA-sequencing-  
735 and mass-spectrometry-related analyses. J.R. and D.A. performed bulk RNA sequencing and  
736 data pre-treatment, H.H., R.F. and M.L. assisted with experimental procedures and analyses.  
737 All authors read and approved the final manuscript.

738

739 **Conflict of interest**

740 The authors declare that they have no competing interests.

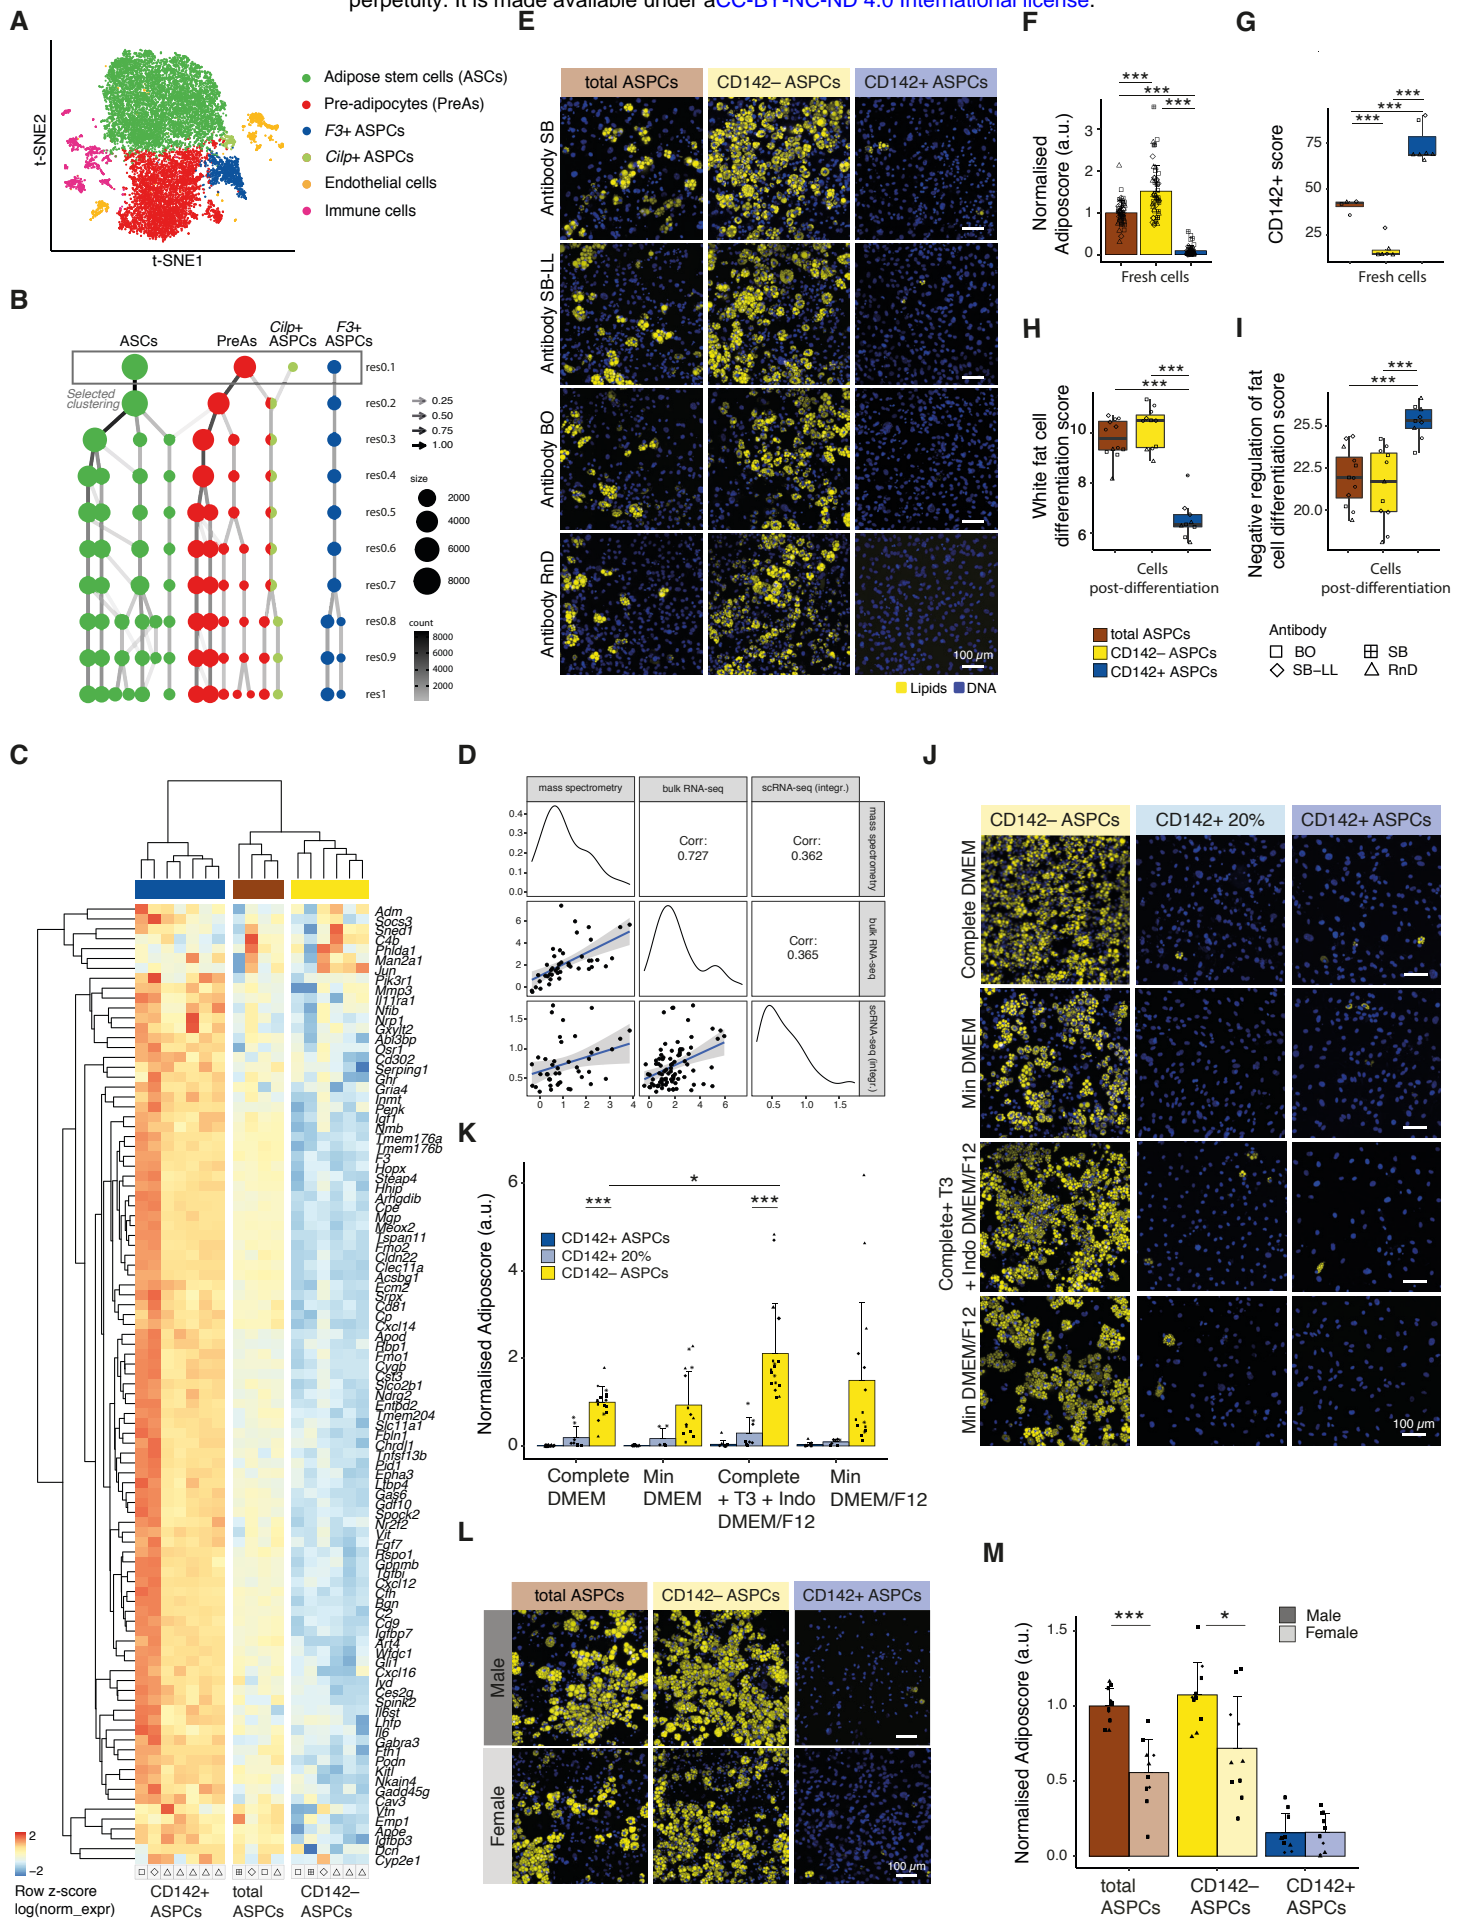

**Figure 1** | See next page for caption

**Figure 1. CD142+ ASPCs constitute a robust ASPC subpopulation defined by a stable non-adipogenic phenotype and a highly specific transcriptomic signature**

- (A) t-SNE cell map of integrated scRNA-seq datasets (see **Methods**) visualizing the main identified subpopulations of murine subcutaneous ASPCs: adipose stem cells (ASCs) in green, pre-adipocytes (PreAs) in red, *F3*(CD142)+ ASPCs in blue, as well as *Cilp*+ ASPCs, endothelial and immune cells (see also **Suppl. Fig. 1**);
- (B) Clustering tree of the Seurat-based clustering result of the integrated analysis described in **A**, visualizing the relationships between clustering at different resolutions of the three main ASPC subpopulations as well as *Cilp*+ ASPCs, demonstrating a high stability of the *F3*(CD142)+ ASPC cluster;
- (C) Gene expression heatmap of the top CD142+ markers (**Suppl. Table 1**) across bulk RNA-seq samples of freshly isolated total, CD142– and CD142+ ASPCs; log normalized expression scaled by row;
- (D) Correlation of the logFC of top CD142+ markers (**Suppl. Table 1**) across scRNA-seq, bulk RNA-seq and mass spectrometry data; logFC was defined as the  $\log_2$ FC of freshly isolated CD142+ over CD142– ASPCs for bulk RNA-seq and mass spectrometry, and as the average logFC of *F3*(CD142)+ over the remaining cells in scRNA-seq across integrated datasets described in **A** (**Methods**);
- (E) Representative fluorescence microscopy images of total, CD142– and CD142+ ASPCs isolated with the use of the respective anti-CD142 antibodies: SinoBiological (SB), SinoBiological-LL (SB-LL), BiOrbyt (BO) and R&D Systems (RnD) (**Suppl. Fig. 2B, Suppl. Fig. 5A, Methods**), after *in vitro* adipogenic differentiation;
- (F) Fraction of differentiated cells per ASPC type shown in **E**, as quantified by the “adiposcore”; marker shapes correspond to different anti-CD142 antibodies used for isolation as indicated, n=9-15, 3-4 biological replicates, 3-5 independent wells for each;
- (G) Boxplot showing the distribution of the “CD142+ score” based on the expression of the top CD142+ ASPC markers (**Suppl. Table 1, Methods**);
- (H) Boxplot showing the distribution of the “white fat cell differentiation score” based on the expression of the genes linked to the GO term “white fat cell differentiation” (GO:0050872) (**Methods**);
- (I) Boxplot showing the distribution of the “negative regulation of fat cell differentiation score” based on the expression of the genes linked to the GO term “negative regulation of fat cell differentiation” (GO:0045599) (**Methods**);
- (J) Representative fluorescence microscopy images of CD142–, 20% CD142+ and (5-7%) CD142+ ASPCs isolated following the sorting strategy shown in **Suppl. Fig. 7A**, after *in vitro* adipogenic differentiation with the indicated white adipogenic differentiation cocktails (**Methods**);
- (K) Fraction of differentiated cells per ASPC type and differentiation cocktail shown in **J**, as quantified by the “adiposcore”; marker shapes correspond to different biological replicates, n=8-17, 3-5 biological replicates, 2-5 independent wells for each;
- (L) Representative fluorescence microscopy images of male- and female-derived total, CD142– and CD142+ ASPCs, isolated following the sorting strategy shown in **Suppl. Fig. 8A** after *in vitro* adipogenic differentiation;
- (M) Fraction of differentiated cells per ASPC type and per sex shown in **L**, as quantified by the “adiposcore”; bar colour shading corresponds to male- and female-derived cells as indicated; marker shapes correspond to different biological replicates, n=9-10, 4 biological replicates, 2-3 independent wells for each;

In all images, nuclei are stained with Hoechst (blue) and lipids are stained with Bodipy (yellow); scale bars, 100  $\mu$ m; bar colours: total ASPCs — brown, CD142– ASPCs — yellow, CD142+ ASPCs — blue, 20% CD142+ ASPCs — turquoise; \*P  $\leq$  0.05, \*\*P  $\leq$  0.01, \*\*\*P  $\leq$  0.001, pairwise two-sided *t*-test (**K, M**) or one-way ANOVA and Tukey HSD *post hoc* test (**F-I**), for statistical details see **Methods**.

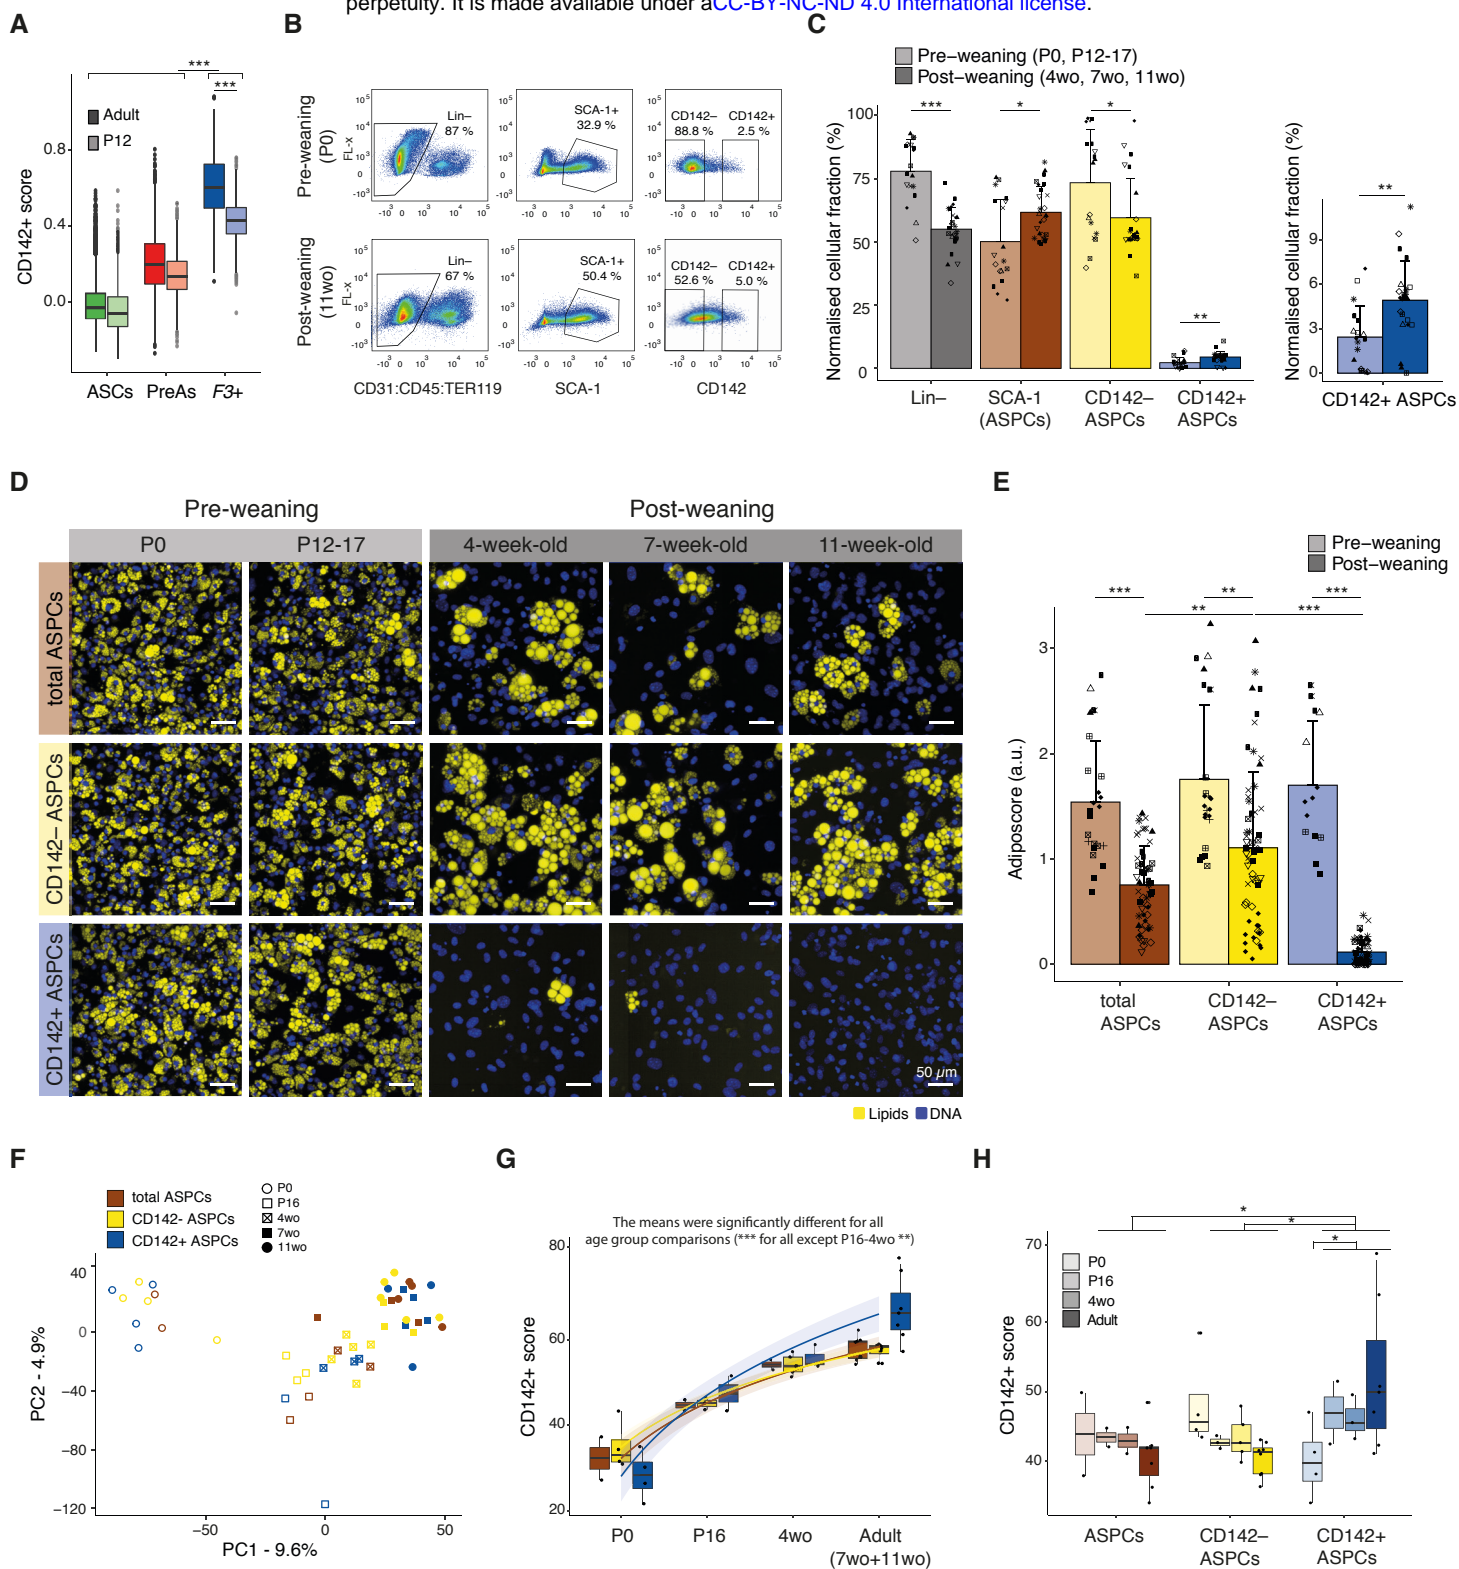

**Figure 2** | See next page for caption

## Figure 2. Age-dependent molecular and phenotypic emergence of *bona fide* CD142+ ASPCs

- (A) Boxplot showing the distribution of the “CD142+ score” (**Suppl. Table 1**) in adult (darker colours) and P12 (lighter colours) ASPCs across the three main ASPC subpopulations (adipose stem cells (ASCs) in green, pre-adipocytes (PreAs) in red and *F3*(CD142)+ ASPCs in blue);
- (B) FACS-based gating strategy of pre-weaning (new-borns (P0))- and post-weaning (11-week-old (wo))-derived Lin<sup>-</sup> (defined as CD31<sup>-</sup> CD45<sup>-</sup> TER119<sup>-</sup>), SCA-1+ (total ASPC), CD142<sup>-</sup> and CD142+ ASPC cellular fractions within the subcutaneous adipose SVF; at least 8 biological replicates were performed, shown here is one representative biological replicate;
- (C) Bar plots showing the normalised parental percentage of pre- and post-weaning indicated cellular fractions; the graph on the right represents the fractions of CD142+ ASPCs plotted separately; marker shapes correspond to different biological replicates, n=8-10;
- (D) Representative fluorescence microscopy images of P0-, P12-17-, 4wo-, 7wo- and 11wo-derived total, CD142<sup>-</sup> and CD142+ APSCs after *in vitro* adipogenic differentiation;
- (E) Fraction of differentiated cells per ASPC type shown in **D**, as quantified by the “adiposcore”; bar colour shading corresponds to pre- and post-weaning-derived cells as indicated; marker shapes correspond to different biological replicates, n=14-65, 12-13 biological replicates, 2-6 independent wells for each;
- (F) PCA based on the bulk RNA-seq data of freshly isolated P0-, P16-, 4wo-, 7wo- and 11wo-mice-derived total, CD142<sup>-</sup> and CD142+ ASPCs;
- (G) Boxplot showing the distribution of the “CD142+ score” (**Suppl. Table 1**) across ages and tested cellular fractions (freshly isolated total, CD142<sup>-</sup> and CD142+ ASPCs) showing the age-dependent emergence of the CD142+ signature; see colour legend in **F**;
- (H) Boxplot showing the distribution of the “CD142+ score” (**Suppl. Table 1**) across ages and tested cellular fractions (freshly isolated total, CD142<sup>-</sup> and CD142+ ASPCs) using the log normalized expression corrected for age-driven source of variation; see colour legend in **F**;

In all images, nuclei are stained with Hoechst (blue) and lipids are stained with Bodipy (yellow); scale bars, 50  $\mu$ m; bar colours: total ASPCs — brown, CD142<sup>-</sup> ASPCs — yellow, CD142+ ASPCs — blue; pre-weaning data are represented in lighter shades; \* $P \leq 0.05$ , \*\* $P \leq 0.01$ , \*\*\* $P \leq 0.001$ , pairwise two-sided *t*-test (**A**, **C**, **E**, **H**) or one-way ANOVA and Tukey HSD *post hoc* test (**G**, null hypothesis: no difference in means across age), for statistical details see **Methods**.



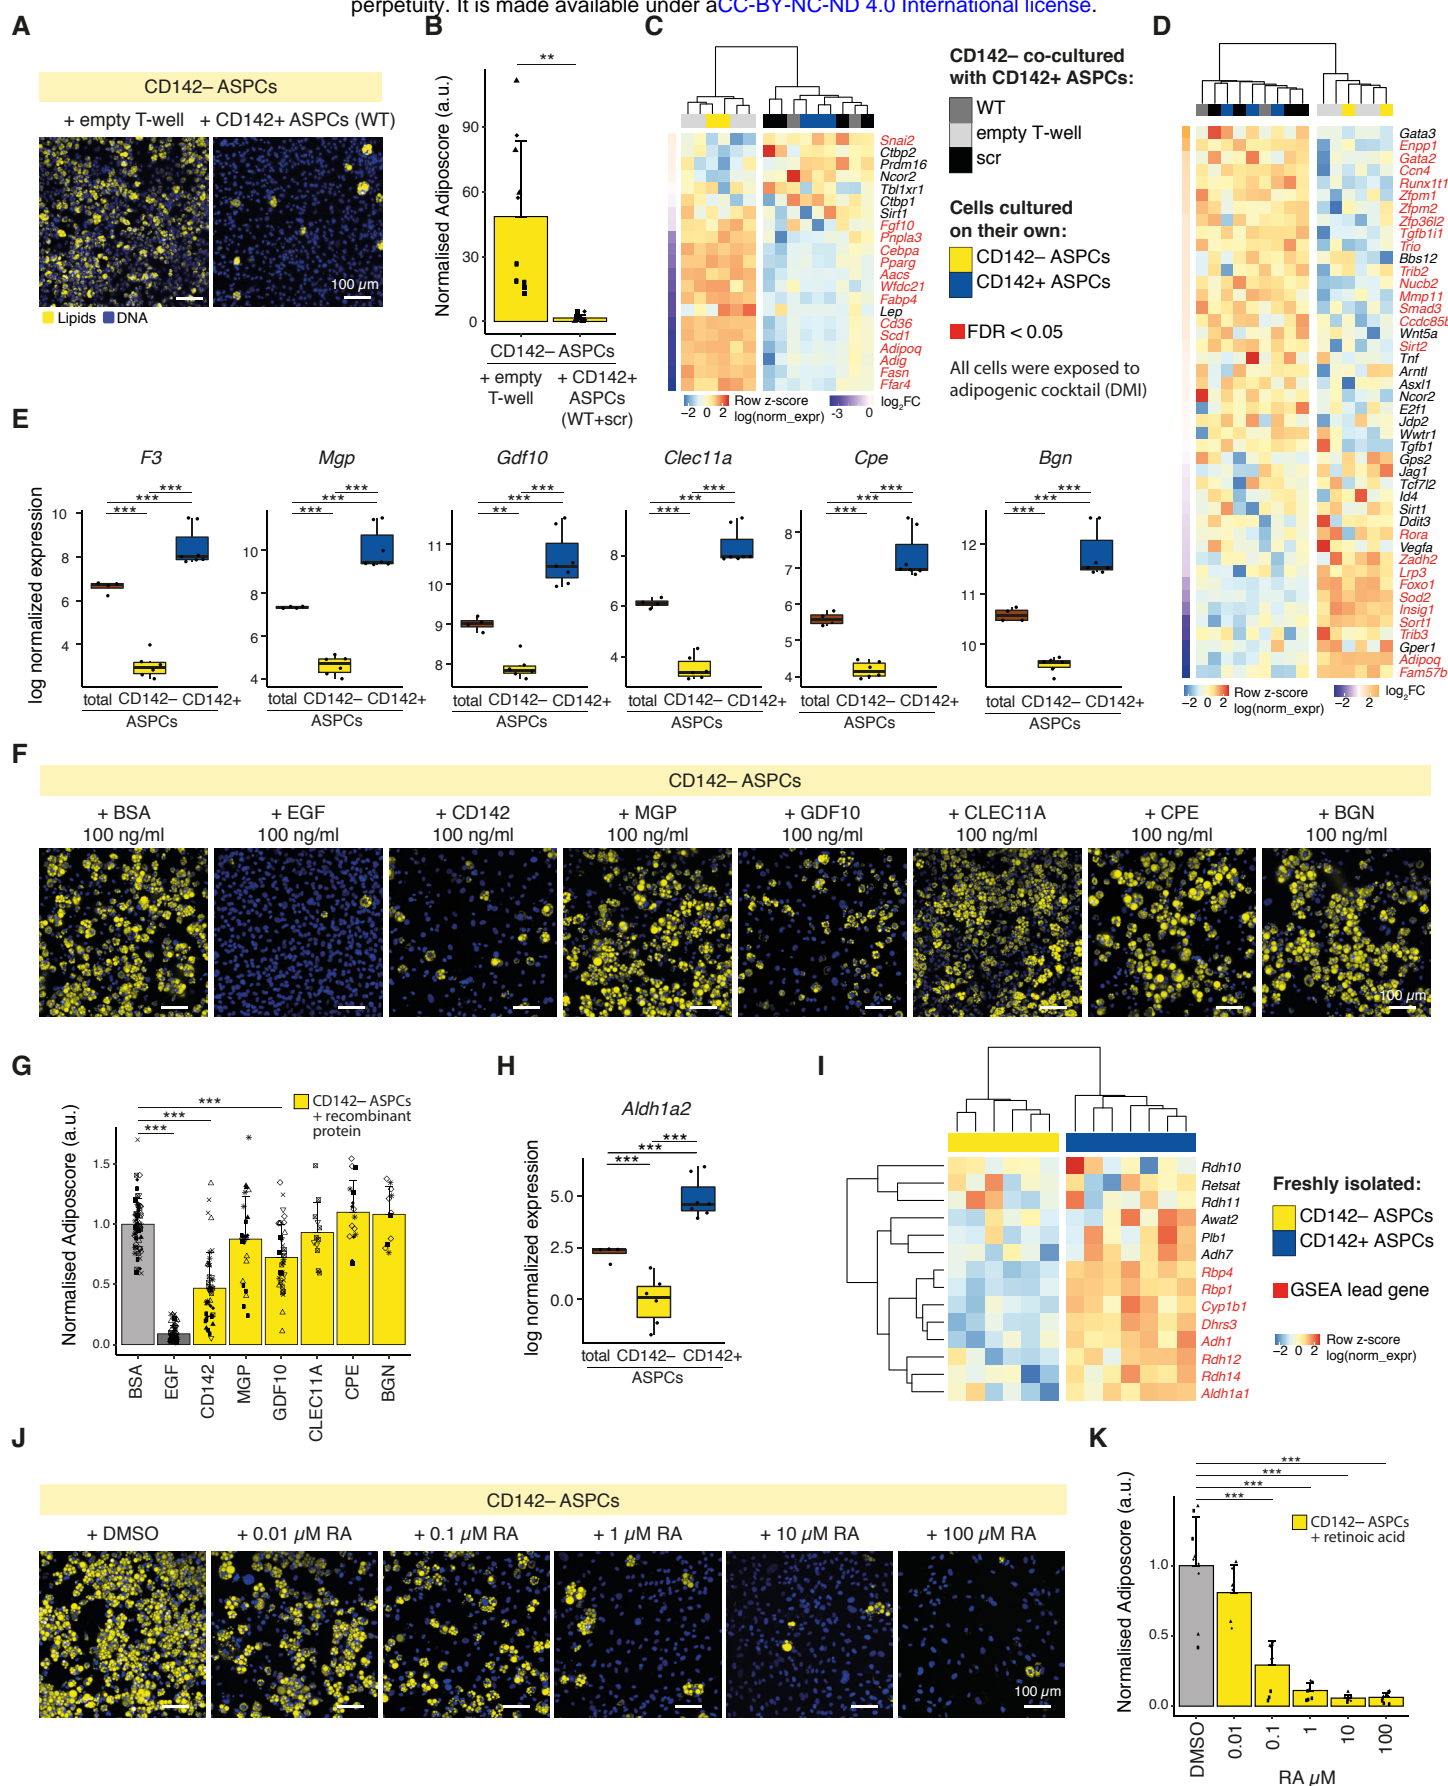

Figure 3 | See next page for caption

### Figure 3. CD142+ ASPC (Areg)-specific candidates and their involvement in adipogenic inhibition

- (A) Representative fluorescence microscopy images of CD142- ASPCs co-cultured with an empty transwell (T-well) or with wild-type (WT) CD142+ ASPCs or CD142+ ASPCs carrying control siRNA (scr) after *in vitro* adipogenic differentiation;
- (B) Fraction of differentiated CD142- ASPCs indicated in **A**, as quantified by the “adiposcore”; marker shapes correspond to different biological replicates, n=10, 4 biological replicates, 2-3 independent wells for each;
- (C) Expression heatmap listing genes linked to “white fat cell differentiation” (GO:0050872) across bulk RNA-seq samples of CD142+ and CD142- ASPCs after adipogenic differentiation (i.e. after exposure to an adipogenic cocktail, **Methods**); the genes are ordered from top to bottom by the  $\log_2$ FC of CD142+ over CD142- ASPCs after adipogenic differentiation; significantly differentially expressed genes (FDR < 0.05) are coloured in red; log normalized expression scaled by row;
- (D) Expression heatmap listing genes linked to “negative regulation of fat cell differentiation” (GO:0045599) across bulk RNA-seq samples of CD142+ and CD142- ASPCs after adipogenic differentiation; the genes are ordered from top to bottom by the  $\log_2$ FC of CD142+ over CD142- ASPCs after adipogenic differentiation; significantly differentially expressed genes (FDR < 0.05) are coloured in red; log normalized expression scaled by row;
- (E) Bulk RNA-seq-derived expression plots of CD142+ ASPC (Areg) markers coding for secreted proteins that were selected for downstream validation: *F3* (coding for CD142), *Mgp* (coding for Matrix Gla protein, MGP), *Gdf10* (GDF10), *Clec11a* (CLEC11A), *Cpe* (Carboxypeptidase E, CPE) and *Bgn* (Biglycan, BGN);
- (F) Representative fluorescence microscopy images of adult-derived CD142- ASPCs after *in vitro* adipogenic differentiation; the induction cocktail was supplemented with recombinant proteins corresponding to the selected Areg-specific candidates: CD142, MGP, GDF10, CLEC11A, CPE and BGN at 100 ng/ml (**Methods**);
- (G) Fraction of differentiated adult-derived CD142- ASPCs, as quantified by the “adiposcore”, treated with the indicated recombinant proteins shown in **F**; marker shapes correspond to different biological replicates, n=11-59, 2-10 biological replicates, 3-9 independent wells for each;
- (H) Bulk RNA-seq-derived expression plot of *Aldh1a2* (coding for Retinal dehydrogenase, RALDH2);
- (I) Expression heatmap listing genes linked to “retinol metabolic process” (GO:0042572) across bulk RNA-seq samples of freshly isolated CD142- and CD142+ ASPCs; genes identified as lead by GSEA (**Methods**) are coloured in red; log normalized expression scaled by row;
- (J) Representative fluorescence microscopy images of adult-derived CD142- ASPCs after *in vitro* adipogenic differentiation with the differentiation cocktail supplemented with DMSO (RA carrier) and RA at the indicated concentrations;
- (K) Fraction of differentiated CD142- ASPCs, as quantified by the “adiposcore”, treated with the indicated recombinant proteins shown in **J**; marker shapes correspond to different biological replicates, n=9, 3 biological replicates, 3 independent wells for each;

In all images, nuclei are stained with Hoechst (blue) and lipids are stained with Bodipy (yellow); scale bars, 100  $\mu$ m, bar colours: total ASPCs — brown, CD142- ASPCs — yellow, CD142+ ASPCs (Aregs) — blue, recombinant BSA or DMSO treatment (negative controls) — light grey, recombinant EGF treatment (positive control) — dark grey; \*P  $\leq$  0.05, \*\*P  $\leq$  0.01, \*\*\*P  $\leq$  0.001, pairwise two-sided *t*-test (**B**, **G**, **K**) or one-way ANOVA and Tukey HSD *post hoc* test (**E**, **H**), for statistical details see **Methods**.

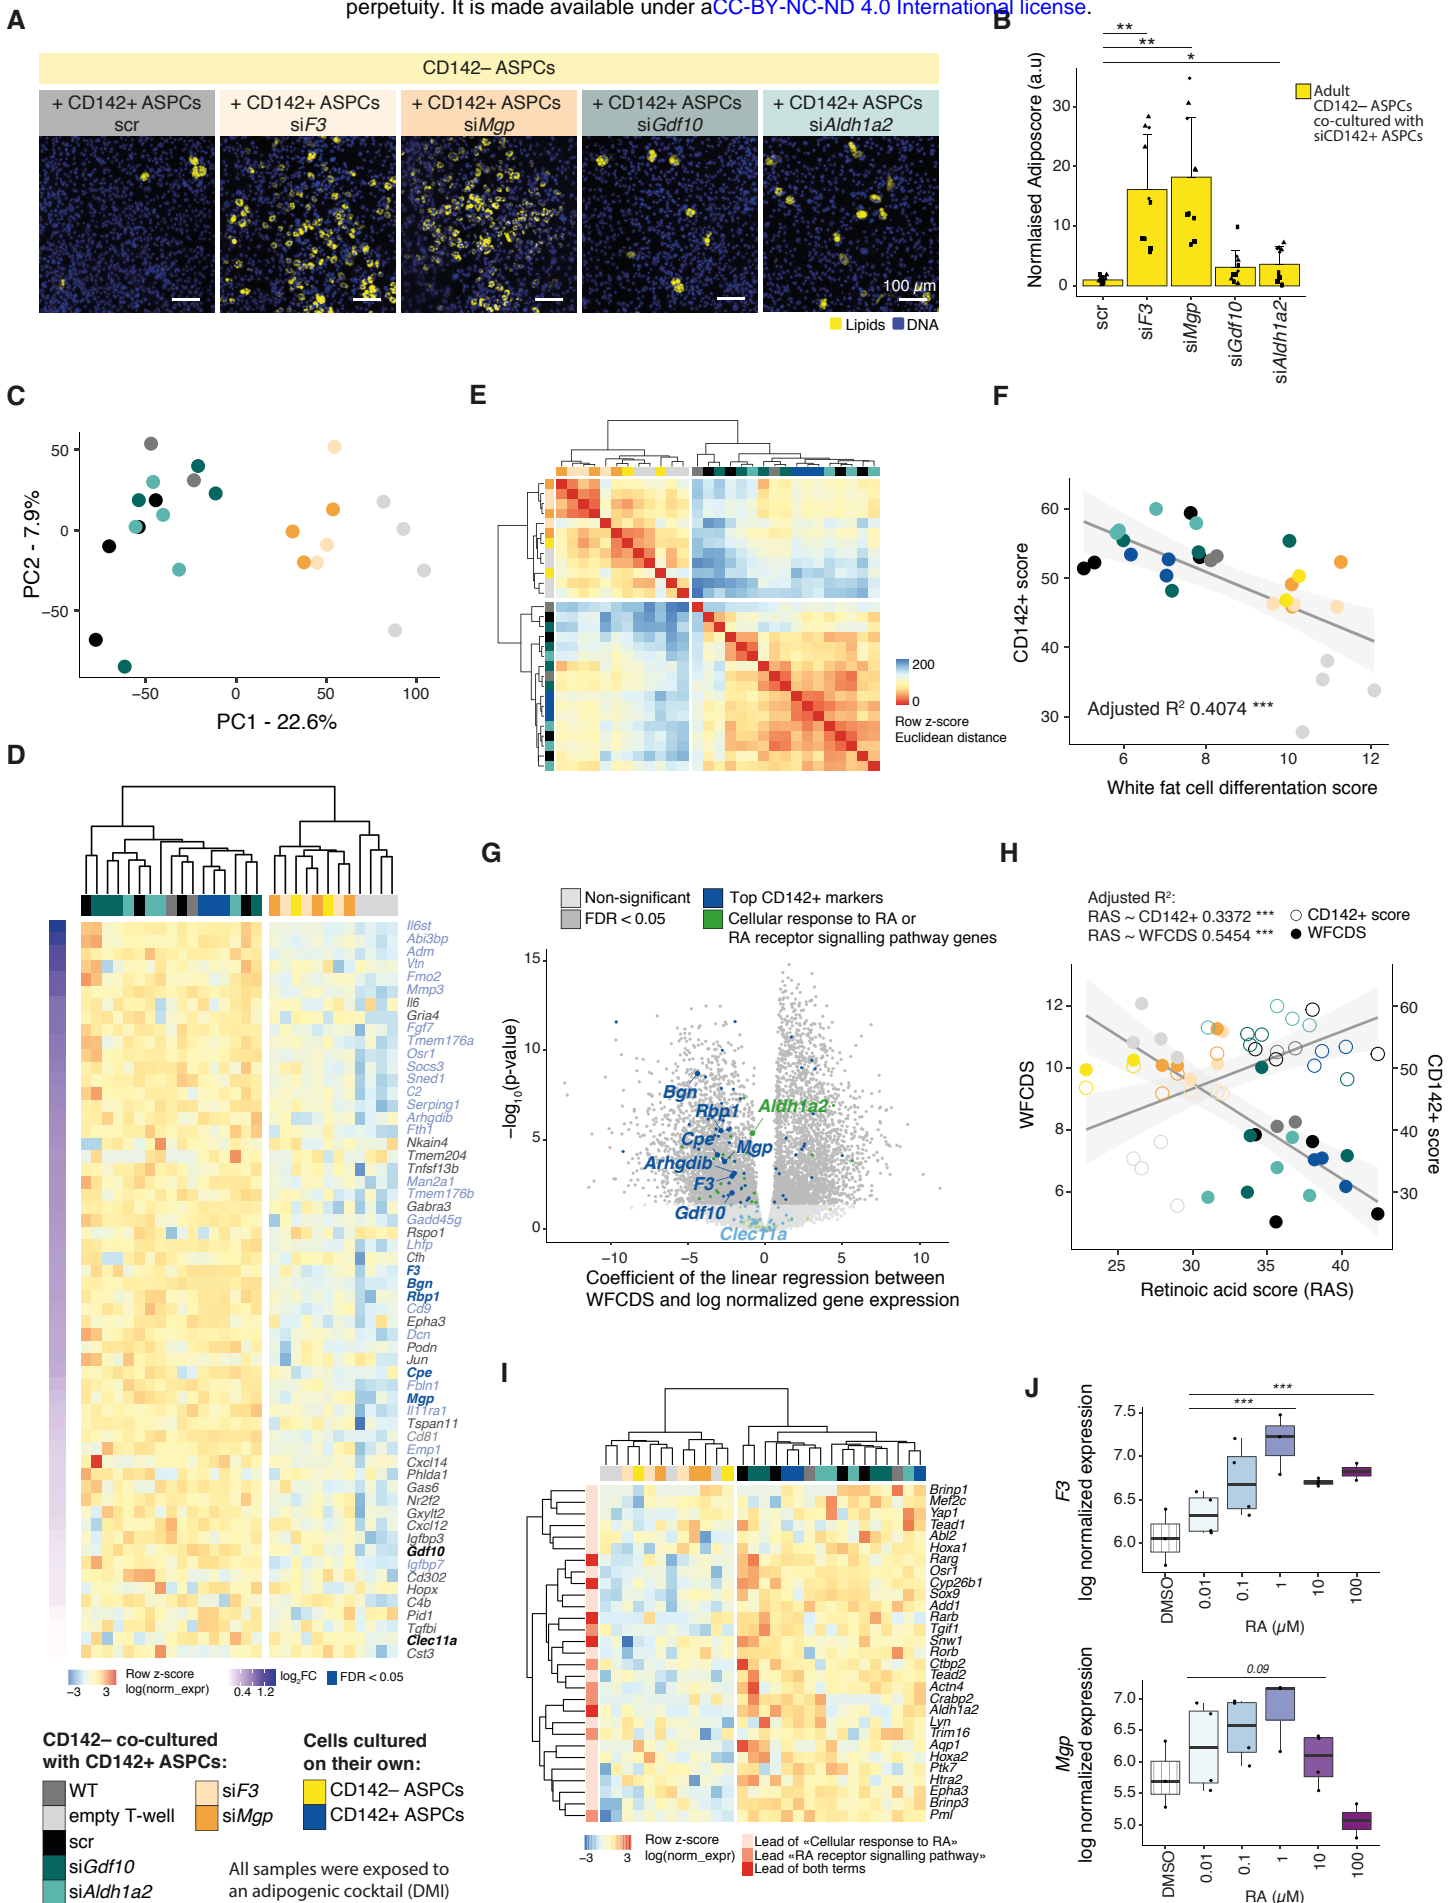

Figure 4 | See next page for caption

#### Figure 4. Molecular (auto-)regulation of CD142+ ASPC (Areg)'s inhibitory activity via RA signalling

- (A) Representative fluorescence microscopy images of CD142- ASPCs, co-cultured with CD142+ ASPCs (Aregs) carrying control (scr) or siRNA-mediated knockdowns of selected CD142+ ASPC (Areg)-specific candidate genes: *F3*, *Mgp*, *Gdf10* and *Aldh1a2* after adipogenic differentiation (i.e. after exposure to an adipogenic cocktail, **Methods**);
- (B) Fraction of differentiated CD142- ASPCs, as quantified by the “adiposcore”, co-cultured with CD142+ ASPCs (Aregs) carrying knockdowns indicated in **A**; marker shapes correspond to different biological replicates, n=10, 4 biological replicates, 2-3 independent wells for each;
- (C) PCA based on bulk RNA-seq data of CD142- ASPCs co-cultured with CD142+ ASPCs (Aregs) carrying knockdowns as indicated in **A**; see colour legend at the bottom of the figure;
- (D) Expression heatmap of top CD142+ markers (i.e. Areg markers, **Suppl. Table 1**) with a positive  $\log_2FC$  when performing differential expression analysis between CD142- ASPCs that were exposed to “active Aregs” (WT, scr, si*Gdf10*, si*Aldh1a2*) versus CD142- ASPCs that were exposed to “dysfunctional Aregs” (si*F3*, si*Mgp*) across the same bulk RNA-seq samples; genes are ordered from the highest (top) to the lowest (bottom)  $\log_2FC$ ; significantly differentially expressed genes (FDR < 0.05) are coloured in blue; Areg candidates are highlighted in bold; log normalized expression scaled by row; see colour legend at the bottom of the figure;
- (E) Heatmap showing the Euclidian distance of the transcriptomic data of CD142- ASPCs co-cultured (via transwell) with distinct CD142+ ASPC knockdown types or controls as well as CD142+ or CD142- ASPCs post-differentiation, calculated on the five first principal components of the PCA shown in **Suppl. Fig. 23D**;
- (F) Correlation of “white fat cell differentiation score” versus “CD142+ score”; see colour legend at the bottom of the figure;
- (G) Volcano plot showing the coefficient of the linear regression performed between “white fat cell differentiation score” (WFCDS) and log normalized gene expression (WFCDS  $\sim$  log(normalized expression)) (x axis) versus the  $-\log_{10}(p\text{-value})$  (y axis); top CD142+ markers (i.e. Areg markers, **Suppl. Table 1**) are highlighted in blue and genes linked to “cellular response to RA” (GO:0071300) and “RA receptor signalling pathway” (GO:0048384) terms in green;
- (H) Correlation plot of “RA score” (RAS) (based on the expression of genes linked to “cellular response to RA” (GO:0071300) and “RA receptor signalling pathway” (GO:0048384)) versus “CD142+ score” (**Suppl. Table 1**) or “white fat cell differentiation score” (WFCDS) (GO:0050872);
- (I) Expression heatmap of the lead genes identified by GSEA of the significantly enriched terms “cellular response to RA” (GO:0071300) and “RA receptor signalling pathway” (GO:0048384); GSEA identified these two terms as enriched when performed on the genes driving PC1 shown in **C**; see colour legend at the bottom of the figure;
- (J) Boxplots showing the distribution of the log normalized expression of *F3* (**top**) or *Mgp* (**bottom**) across transcriptomic data of CD142- ASPCs treated with an adipogenic cocktail supplemented with DMSO or different concentrations of RA (0.01 to 100  $\mu$ M); the indicated significance is based on the result of differential expression analysis between all RA treated samples or samples treated with RA of a concentration between 0.01 and 1  $\mu$ M versus controls (treatment with DMI with or without DMSO);

In all images, nuclei are stained with Hoechst (blue) and lipids are stained with Bodipy (yellow); scale bars, 100  $\mu$ m; \*P  $\leq$  0.05, \*\*P  $\leq$  0.01, \*\*\*P  $\leq$  0.001, pairwise two-sided *t*-test (**B**), for statistical details see **Methods**.
